# Supplementary material for: Introduction of O-sulfonated poly(vinylpyrrolidonium) hydrogen sulfate as an efficient, and reusable solid acid catalyst for some solvent-free multicomponent reactions
Source: Royal Society of Chemistry journal article supplement (doi:10.1039/c6ra08486a), 2016-01-01
Supplement: c6ra08486a1.pdf [file c6ra08486a1.pdf]

## Supporting Information

### **Introduction of *O*-sulfonated poly(vinylpyrrolidonium) hydrogen sulfate as an efficient, and reusable solid acid catalyst for some of the solvent-free multicomponent reactions**

Omid Goli-Jolodar, Farhad Shirini\* and Mohadeseh Seddighi

Department of Chemistry, Faculty of Sciences, University of Guilan, Rasht, zip code: 41335.

Post Box: 1914, I. R. Iran. Tel./Fax: +98 131 3233262, E-mail address: shirini@guilan.ac.i

## **Experimental**

### **Material**

Chemicals were purchased from Fluka, Merck, Aldrich and Southern Clay Products Chemical Companies. Yields refer to isolated products. Products were characterized by their physical constants, comparison with authentic samples and IR and NMR spectroscopy. The purity determination of the substrate and reaction monitoring were accomplished by TLC on silics-gel polygram SILG / UV 254 plates.

### **Instrumentation**

The FT-IR spectra were run on a VERTEX 70 Bruker company (Germany). Thermogravimetric analyses (TGA) were performed on TG/DTA6300 SII-Nonotechnology Company (Japan) (Samples were heated from 25 to 800 °C at ramp 10 °C min<sup>-1</sup> under N<sub>2</sub>atmosphere). Scanning electron microphotographs (SEM) were obtained on a SEM-Philips XL30. The Wide-angle X-ray diffraction (XRD) measurements were performed at room temperature on a Siemens D-500 X-ray diffractometer (Germany), using Ni-filtered Co-K $\alpha$  radiation ( $\lambda = 0.15418$  nm). Elemental analyses of the samples were performed on a Vario EL III CHNOS Elemental Analyzer (Germany).

### **General procedure for the preparation of the [PVP-SO<sub>3</sub>H]HSO<sub>4</sub> solid acid catalyst**

Chlorosulfonic acid (1.2 mL, 18 mmol) was added to a suspension of powdered poly(vinylpyrrolidone) (2.0 g) [cross-linked poly(4-vinylpyridine) with MW > 1,000,000] in 10 mL dry CH<sub>2</sub>Cl<sub>2</sub> over a period of 15 min. The mixture was stirred at room temperature for 3h and then the mixture was filtered. The solid residue was washed with ethyl acetate (20 mL) and dried at 80 °C to afford [PVP-SO<sub>3</sub>H]Cl as a pale yellow powder.<sup>50</sup> The amount of chloride in [PVP-SO<sub>3</sub>H]Cl was determined by potentiometric titration methods.<sup>51</sup> For this purpose, 0.5 g [PVP-SO<sub>3</sub>H]Cl in 50 mL water was titrated with 0.1 M AgNO<sub>3</sub>. As shown in Fig. 1, the change happened at 15 mL of consumed AgNO<sub>3</sub>. On the basis of these studies it can be concluded that [PVP-SO<sub>3</sub>H]Cl has 3 mmol of Cl<sup>-</sup> per gram of this reagent. After modulating of chloride, 3 g of [PVP-SO<sub>3</sub>H]Cl was suspended in 20 mL of dry CH<sub>2</sub>Cl<sub>2</sub>. Then and under vigorous stirring, 9 mmol of concentrated H<sub>2</sub>SO<sub>4</sub> (97%) was added drop wise to this mixture in an ice bath (0 °C) over a period of 15 min. The mixture was then warmed to room temperature and heated under reflux for 8 h. When the formed HCl was completely distilled off, the solution was cooled and CH<sub>2</sub>Cl<sub>2</sub> was removed under vacuum to afford *O*-sulfonated poly(vinylpyrrolidonium) hydrogen sulfate ([PVP-SO<sub>3</sub>H]HSO<sub>4</sub>) as the brown solid product (4.8 gr).

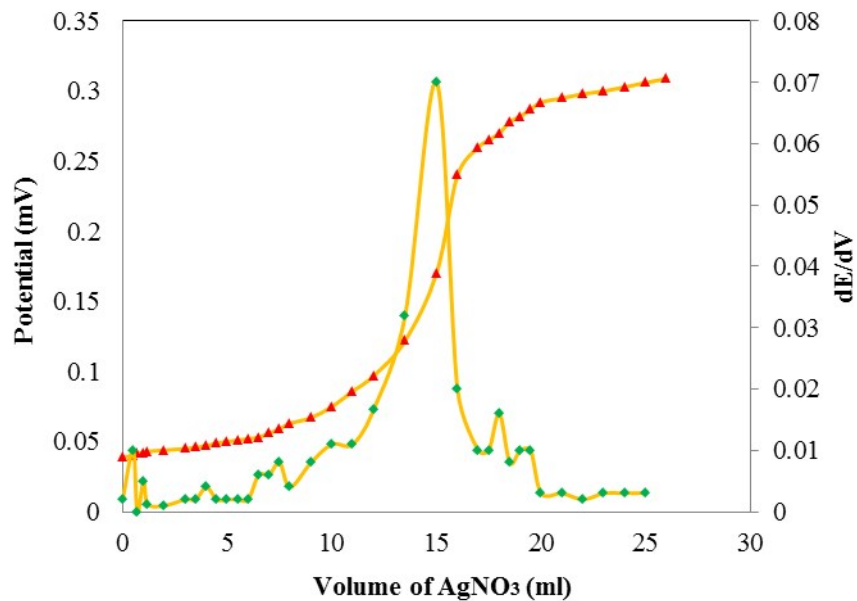

**Fig. 1.** Potentiometric titration curve of [PVP-SO<sub>3</sub>H]Cl with AgNO<sub>3</sub>.

**Table 1.** Elemental analysis data of the PVP (1), [PVP-SO<sub>3</sub>H]Cl (2) and [PVP-SO<sub>3</sub>H]HSO<sub>4</sub> (3) samples.

|                       | Entry | PVP   | [PVP-SO <sub>3</sub> H]Cl | [PVP-SO <sub>3</sub> H]HSO <sub>4</sub> |
|-----------------------|-------|-------|---------------------------|-----------------------------------------|
| <b>Calcul. (%)</b>    | C     | 68.04 | 37.28                     | 30.09                                   |
|                       | H     | 10.71 | 6.26                      | 5.37                                    |
|                       | N     | 9.92  | 5.43                      | 4.39                                    |
|                       | Cl    | —     | 13.75                     | —                                       |
| <b>Found (%)</b>      | C     | 67.89 | 35.42                     | 25.57                                   |
|                       | H     | 10.65 | 5.82                      | 4.51                                    |
|                       | N     | 10.12 | 5.10                      | 3.63                                    |
|                       | Cl    | —     | 12.78                     | —                                       |
| <b>Conversion (%)</b> |       | —     | ~ 95                      | ~ 85                                    |

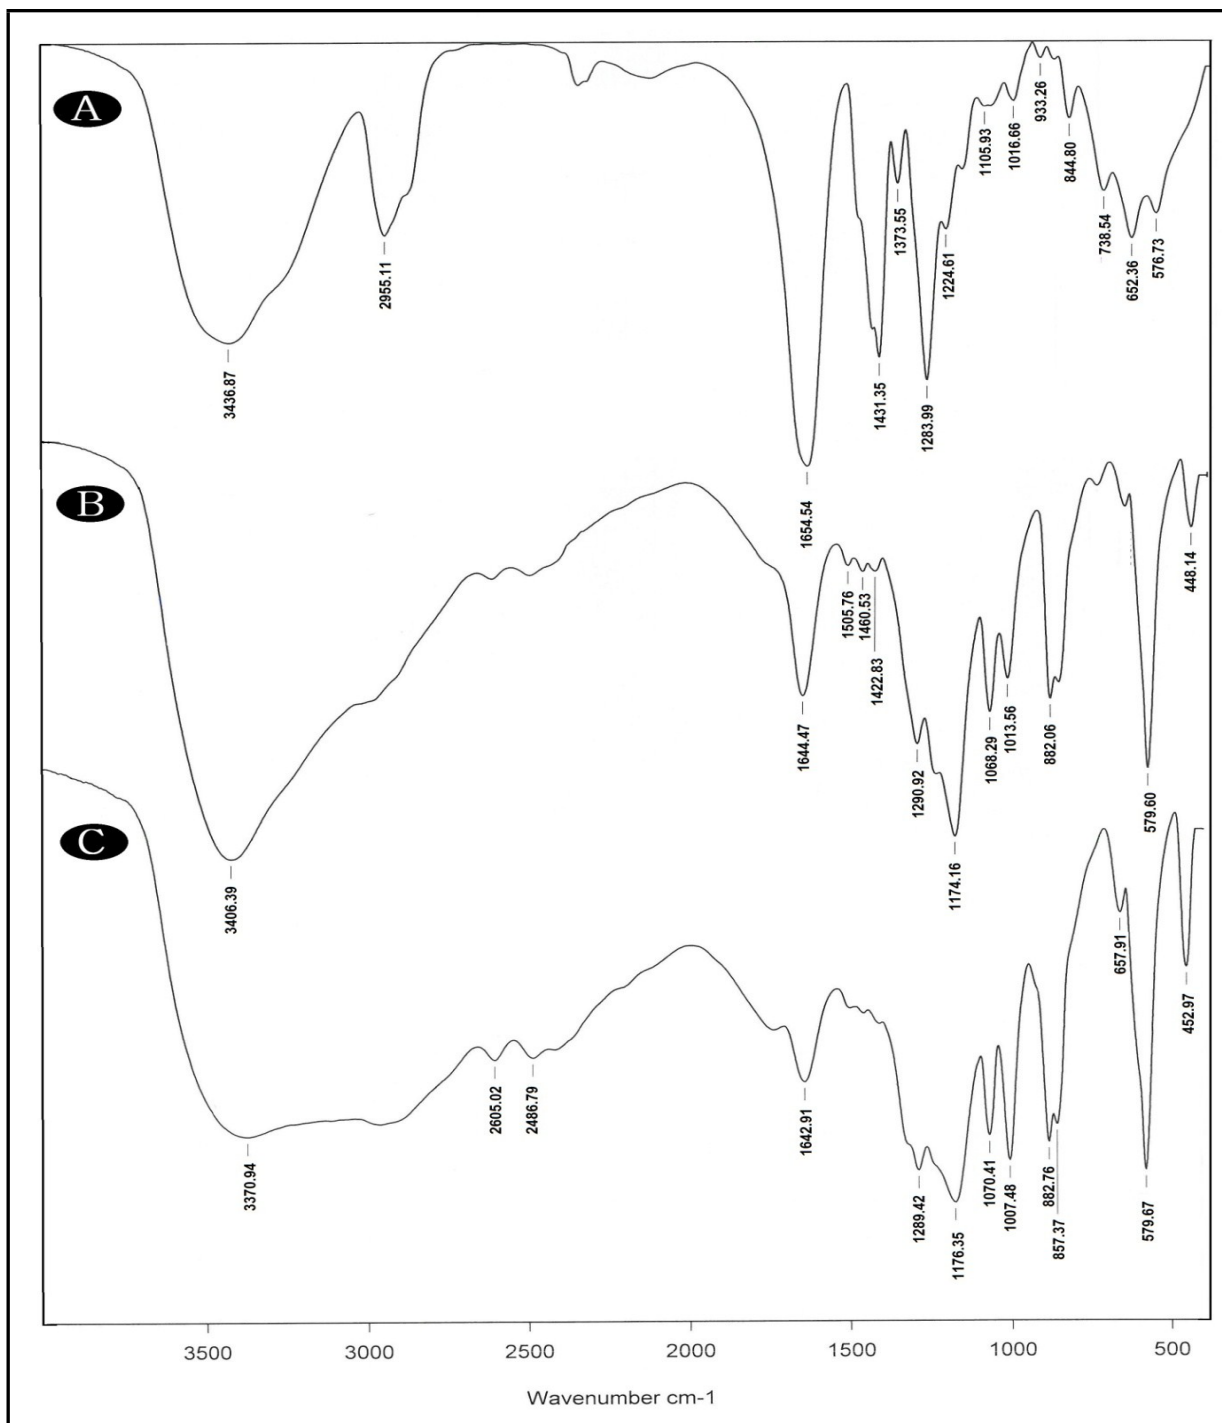

**Fig. 2.** FT-IR spectra of PVP (A), [PVP-SO<sub>3</sub>H]Cl (B) and [PVP-SO<sub>3</sub>H]HSO<sub>4</sub> (C).

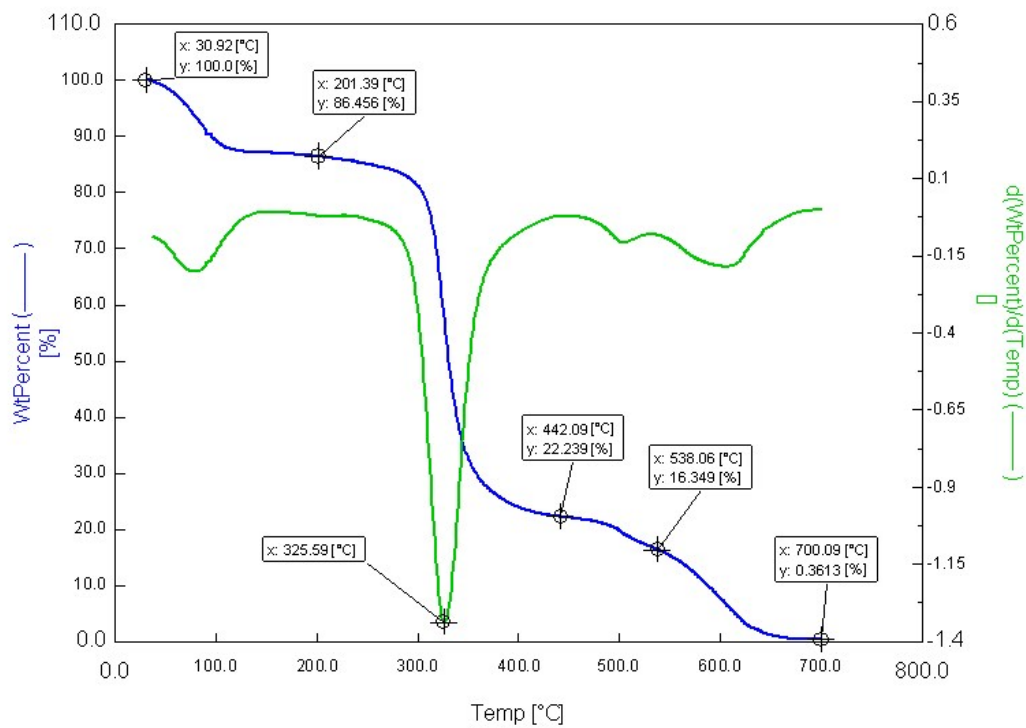

**Fig. 3.** TGA and DTGA curves for [PVP-SO<sub>3</sub>H]HSO<sub>4</sub>.

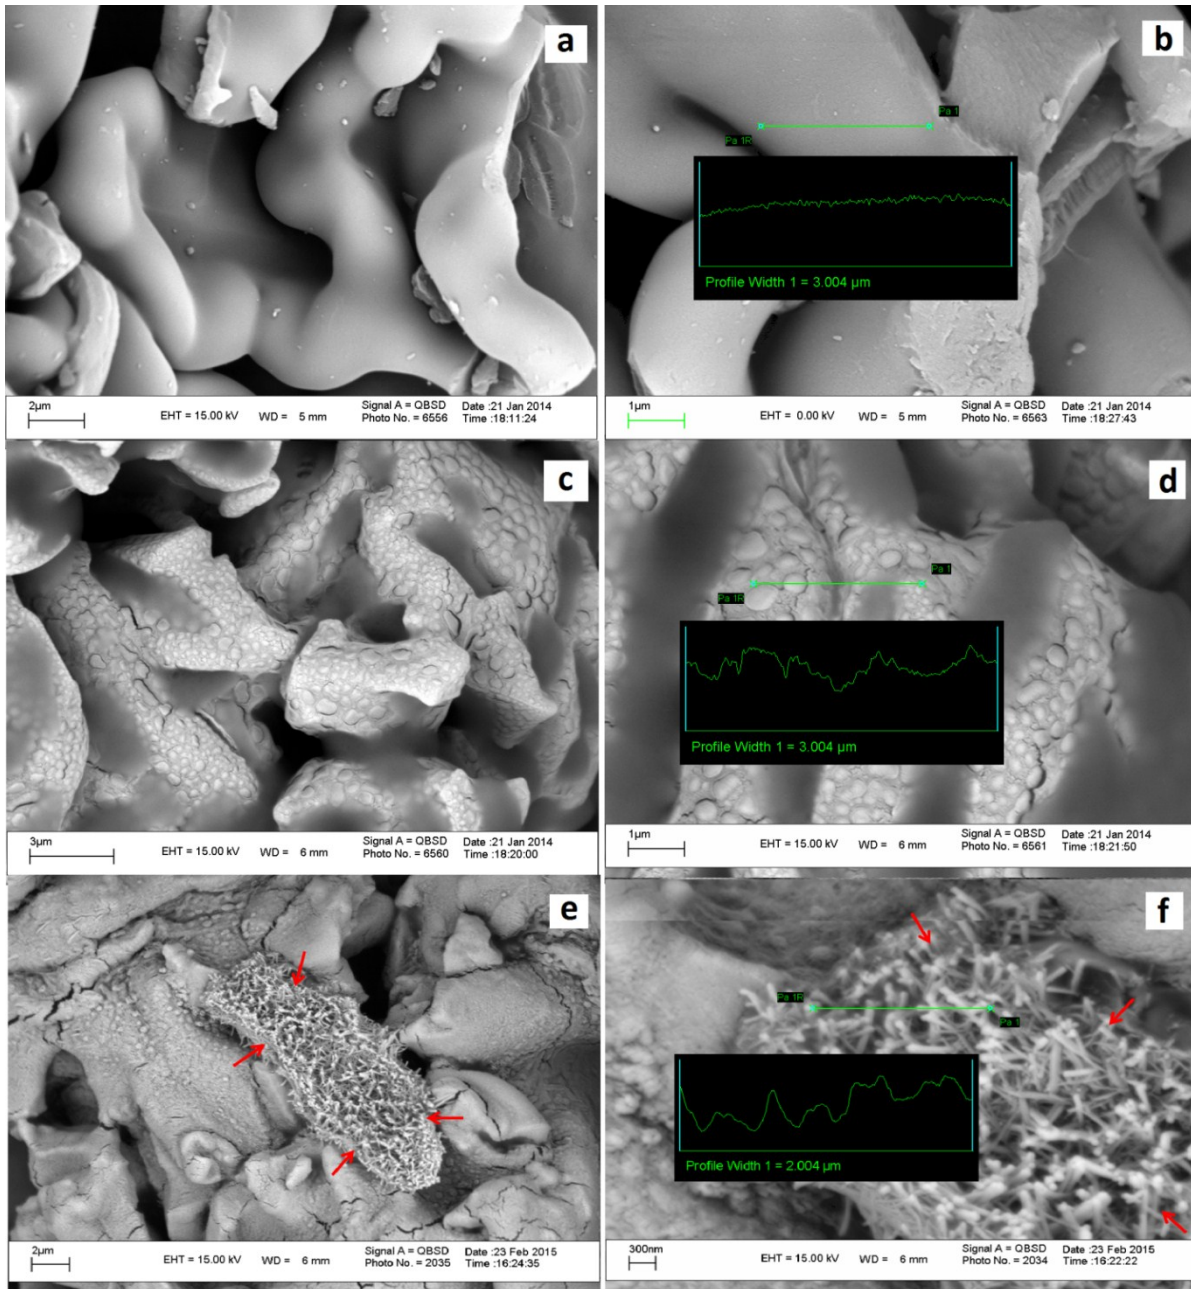

**Fig. 4.** SEM micrographs of PVP (a,b) [PVP-SO<sub>3</sub>H]Cl (c,d) and [PVP-SO<sub>3</sub>H]HSO<sub>4</sub> (e,f).

**Table 2.** Calculation of Hammett acidity function ( $H_0$ ) for [PVP-SO<sub>3</sub>H]Cl and [PVP-SO<sub>3</sub>H]HSO<sub>4</sub>.

| Entry | Catalyst                                 | $A_{\max}$ | [I] <sub>s</sub> % | [IH <sup>+</sup> ] <sub>s</sub> % | $H_0$ |
|-------|------------------------------------------|------------|--------------------|-----------------------------------|-------|
| 1     | —                                        | 2.2086     | 100                | 0                                 | 0.99  |
| 2     | [PVP-SO <sub>3</sub> H] Cl               | 1.0025     | 45.39              | 54.61                             | 0.90  |
| 3     | [PVP-SO <sub>3</sub> H] HSO <sub>4</sub> | 0.2318     | 10.49              | 89.51                             | 0.058 |
| 4     | Recovered catalyst                       | 0.7384     | 33.43              | 66.56                             | 0.69  |

Condition for UV-visible spectrum measurement: solvent: CCl<sub>4</sub>, indicator: 4-nitroaniline (pK (I) aq= 0.99), 1.44×10<sup>-4</sup> mol/L (10 mL); Catalyst: [PVP-SO<sub>3</sub>H]Cl and [PVP-SO<sub>3</sub>H]HSO<sub>4</sub> (5 mg), 25 °C.

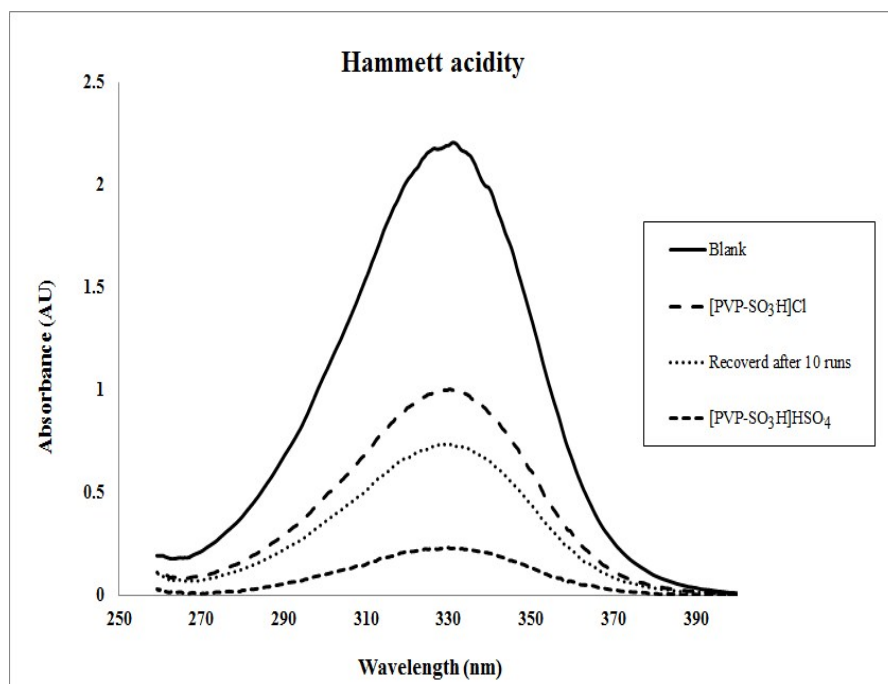

**Fig. 5.** Absorption spectra of 4-nitroaniline (indicator) [PVP-SO<sub>3</sub>H]Cl and [PVP-SO<sub>3</sub>H]HSO<sub>4</sub>(catalyst) in CCl<sub>4</sub>.



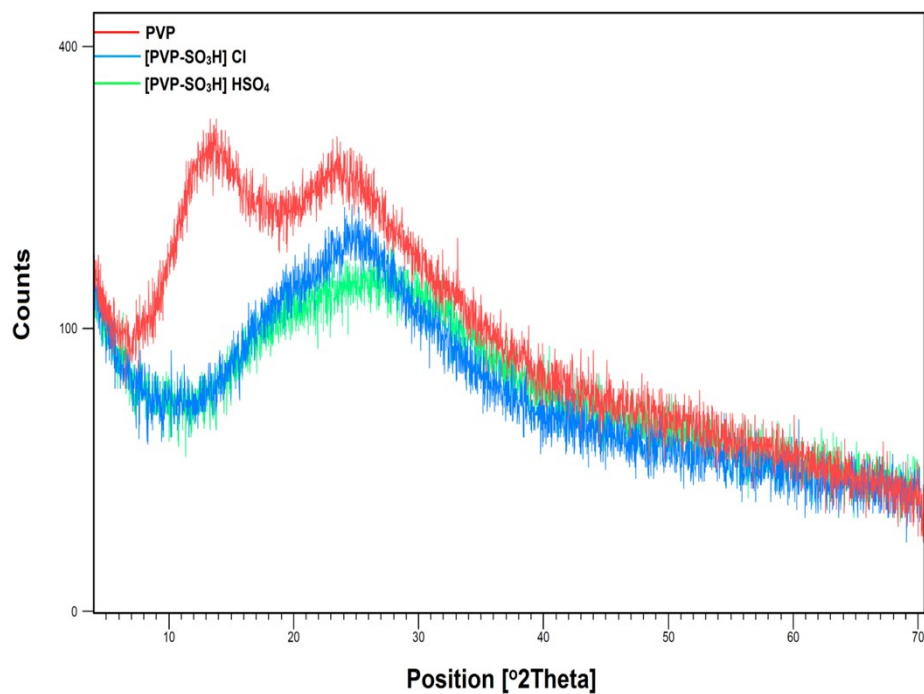

**Fig. 6.** XRD patterns of PVP in comparison with [PVP-SO<sub>3</sub>H]Cl and [PVP-SO<sub>3</sub>H]HSO<sub>4</sub>.

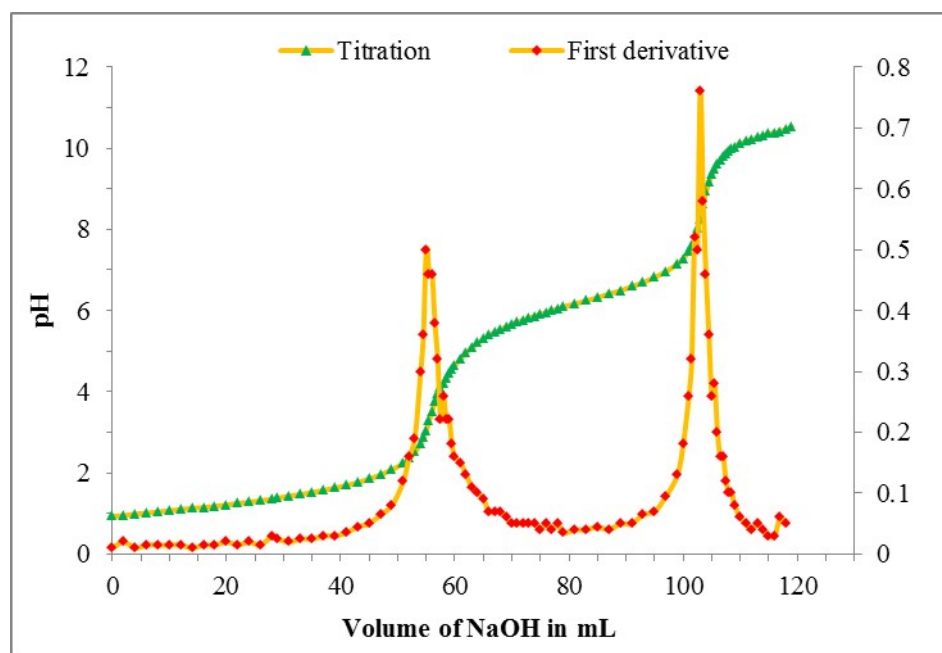

**Fig. 7.** pH meter titration curve of [PVP-SO<sub>3</sub>H]HSO<sub>4</sub> with NaOH (0.05 M).

## General procedure for the synthesis of tetrahydrobenzimidazo[2,1-*b*]quinazolin-1(2*H*)-one derivatives

A mixture of the requested aldehyde (1 mmol), 2-aminobenzimidazole (1 mmol), dimedone (1 mmol) and [PVP-SO<sub>3</sub>H]HSO<sub>4</sub> (25 mg, 8.65 mol%) was heated in an oil bath (90 °C) under solvent-free conditions for the appropriate time. After completion of the reaction that monitored by TLC [*n*-hexane : ethylacetate(8:4)], EtOH was added and the catalyst was separated by filtration. Then water was added and the precipitated product was separated by filtration in high purity.

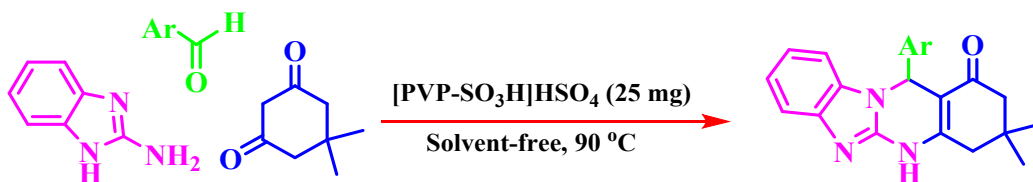

**Scheme 1.** Synthesis of tetrahydrobenzimidazo[2,1-*b*]quinazolin-1(2*H*)-one derivatives catalyzed by [PVP-SO<sub>3</sub>H]HSO<sub>4</sub>.

**Table 3.** Preparation of tetrahydrobenzimidazo[2,1-*b*]quinazolin-1(2*H*)-one derivatives using [PVP-SO<sub>3</sub>H]HSO<sub>4</sub> as the catalyst.

| Entry | Aldehyde                                                                            | Time (min) | Yield (%) <sup>a</sup> | Melting point (°C) |                          |
|-------|-------------------------------------------------------------------------------------|------------|------------------------|--------------------|--------------------------|
|       |                                                                                     |            |                        | Found              | Reported <sup>Ref.</sup> |
| 1A    | C <sub>6</sub> H <sub>5</sub> -                                                     | 12         | 94                     | >350               | 359-363 <sup>20</sup>    |
| 1B    | 2-Cl-C <sub>6</sub> H <sub>4</sub> -                                                | 16         | 92                     | 340-342            | >300 <sup>30</sup>       |
| 1C    | 3-Br-C <sub>6</sub> H <sub>5</sub> -                                                | 15         | 93                     | 334-336            | >300 <sup>30</sup>       |
| 1D    | 2-CH <sub>3</sub> -C <sub>6</sub> H <sub>5</sub> -                                  | 25         | 92                     | 334-336            | >300 <sup>30</sup>       |
| 1E    | 3-Cl-C <sub>6</sub> H <sub>4</sub> -                                                | 12         | 94                     | 340-342            | >300 <sup>30</sup>       |
| 1F    | 3-CH <sub>3</sub> O-C <sub>6</sub> H <sub>5</sub> -                                 | 13         | 94                     | 320-322            | >300 <sup>31</sup>       |
| 1G    | 3-NO <sub>2</sub> -C <sub>6</sub> H <sub>5</sub> -                                  | 13         | 95                     | 335-337            | >300 <sup>30</sup>       |
| 1H    | 4-Cl-C <sub>6</sub> H <sub>4</sub> -                                                | 14         | 96                     | >350               | >300 <sup>20</sup>       |
| 1I    | 4-Br-C <sub>6</sub> H <sub>4</sub> -                                                | 14         | 94                     | >350               | >300 <sup>20</sup>       |
| 1J    | 4-CH <sub>3</sub> O-C <sub>6</sub> H <sub>5</sub> -                                 | 10         | 94                     | 340-342            | >300 <sup>20</sup>       |
| 1K    | 4-NO <sub>2</sub> -C <sub>6</sub> H <sub>5</sub> -                                  | 8          | 95                     | 344-346            | >300 <sup>20</sup>       |
| 1L    | 4-OH-C <sub>6</sub> H <sub>5</sub> -                                                | 25         | 93                     | 332-334            | 330-332 <sup>20</sup>    |
| 1M    | 4-CH <sub>3</sub> S-C <sub>6</sub> H <sub>4</sub> -                                 | 10         | 92                     | 342-344            | -                        |
| 1N    | 4-CN-C <sub>6</sub> H <sub>5</sub> -                                                | 10         | 94                     | 340-342            | -                        |
| 1O    | 4-CH <sub>3</sub> -C <sub>6</sub> H <sub>5</sub> -                                  | 20         | 94                     | 340-342            | >300 <sup>31</sup>       |
| 1P    | 2-naphthyl-                                                                         | 15         | 93                     | 344-346            | -                        |
| 1Q    | 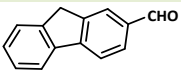 | 15         | 92                     | 347-349            | -                        |

<sup>a</sup> Isolated yield.



The spectral data of the selected compounds:

**3,3-Dimethyl-12-(4-thiomethyl-phenyl)-3,4,5,12-tetrahydrobenzimidazo [2,1-*b*]quinazolin-1(2*H*)-one (1M):** White solid, Yield: 87 %, M.p. 342-344 °C; FT-IR (KBr)  $\nu_{\max}$  = 3418, 3148, 2954, 1671, 1568, 1375, 1262, 744  $\text{cm}^{-1}$ ;  $^1\text{H}$  NMR (DMSO- $d_6$ , 400 MHz):  $\delta$  1.07 (6H, s,  $\text{CH}_3$ ), 2.15 (4H, s,  $\text{CH}_2$ ), 2.40 (3H, s,  $\text{SCH}_3$ ), 6.12 (1H, s), 6.93 (2H, d,  $J = 8.0$  Hz), 7.03 (2H, d,  $J = 7.6$  Hz), 7.07-7.11 (2H, m), 7.25-7.28 (2H, m), 7.65 (1H, s, NH) ppm.;  $^{13}\text{C}$  NMR (DMSO- $d_6$ , 100 Mz):  $\delta$  = 15.8, 28.8, 30.3, 31.6, 48.8, 111.8, 114.8, 122.1, 126.1, 128.1, 132.7, 133.1, 142.8, 152.5 ppm.

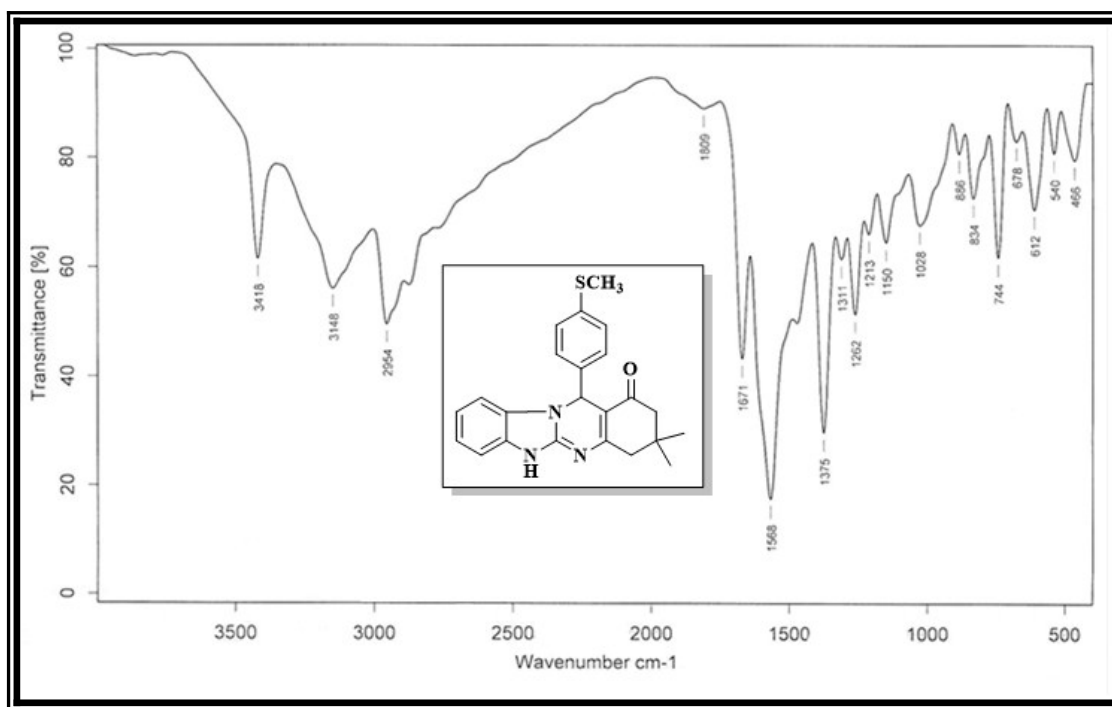

**Fig. 8.** FT-IR of 3,3-Dimethyl-12-(4-thiomethyl-phenyl)-3,4,5,12-tetrahydrobenzimidazo [2,1-*b*]quinazolin-1(2*H*)-one

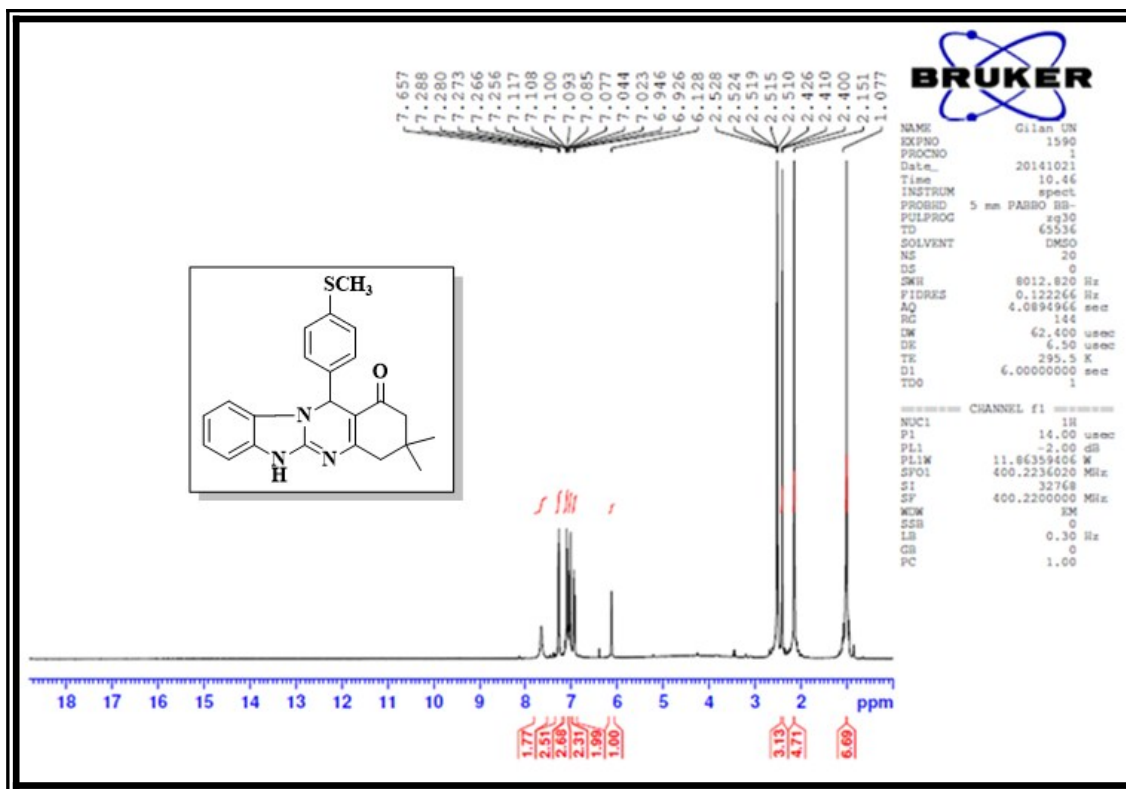

**Fig. 9.**  $^1\text{H}$  NMR of 3,3-Dimethyl-12-(4-thiomethyl-phenyl)-3,4,5,12-tetrahydrobenzimidazo[2,1-*b*]quinazolin-1(2*H*)-one.

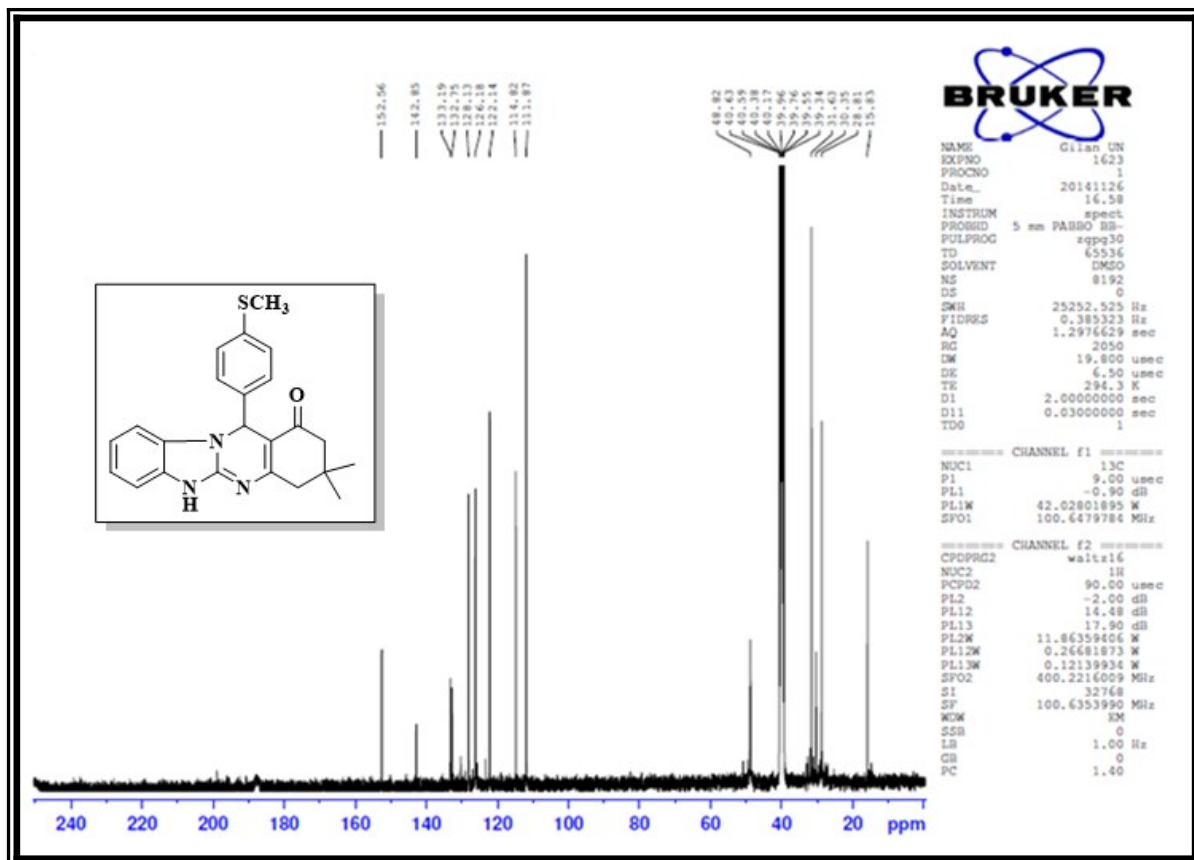

**Fig. 10.**  $^{13}\text{C}$  NMR of 3,3-Dimethyl-12-(4-thiomethyl-phenyl)-3,4,5,12-tetrahydrobenzimidazo [2,1-*b*]quinazolin-1(2*H*)-one.

**3,3-Dimethyl-12-(4-cyano-phenyl)-3,4,5,12-tetrahydrobenzimidazo[2,1-*b*]quinazolin-1(2*H*)-one (1N):** White solid, Yield: 92%, M.p. 340-342 °C; FT-IR (KBr)  $\nu_{\max}$  = 3425, 3045, 2962, 2227, 1567, 1448, 1358, 1264, 748  $\text{cm}^{-1}$ ;  $^1\text{H}$  NMR (DMSO-*d*<sub>6</sub>, 400 MHz):  $\delta$  0.92 (3H, s, CH<sub>3</sub>), 1.07 (3H, s, CH<sub>3</sub>), 2.07 (1H, d, *J* = 16.0 Hz), 2.28 (1H, d, *J* = 16.0 Hz), 2.67-2.69 (2H, m), 6.56 (1H, s), 6.98 (1H, td, *J*<sub>1</sub> = 8.0 Hz, *J*<sub>2</sub> = 0.8 Hz), 7.08 (1H, td, *J*<sub>1</sub> = 8.2 Hz, *J*<sub>2</sub> = 0.8 Hz), 7.41 (1H, d, *J* = 8.0 Hz), 7.24 (1H, d, *J* = 8.0 Hz), 7.54 (2H, dd, *J*<sub>1</sub> = 5.0 Hz, *J*<sub>2</sub> = 1.6 Hz), 7.75 (2H, dd, *J*<sub>1</sub> = 5.0 Hz, *J*<sub>2</sub> = 1.6 Hz), 11.26 (1H, s, NH) ppm.;  $^{13}\text{C}$  NMR (DMSO-*d*<sub>6</sub>, 100 Mz): Sample solubility was too low for  $^{13}\text{C}$  NMR.

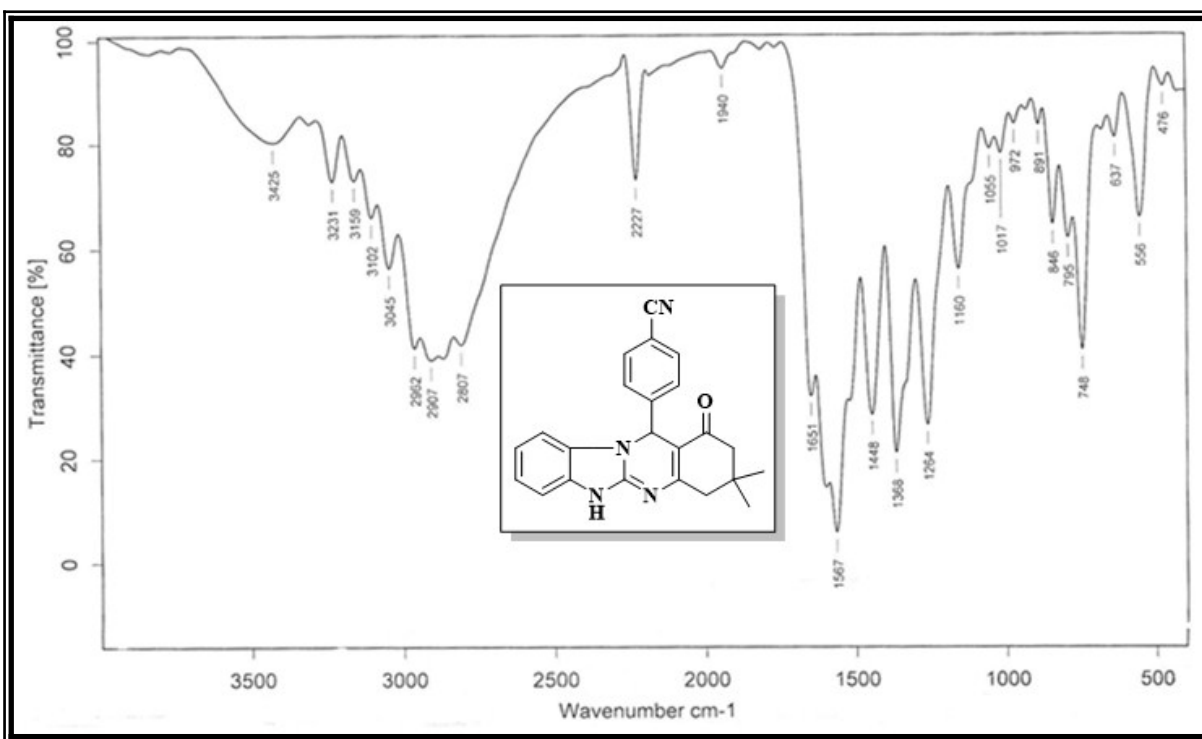

**Fig. 11.** FT-IR of 3,3-Dimethyl-12-(4-cyano-phenyl)-3,4,5,12-tetrahydrobenzimidazo[2,1-*b*]quinazolin-1(2*H*)-one.



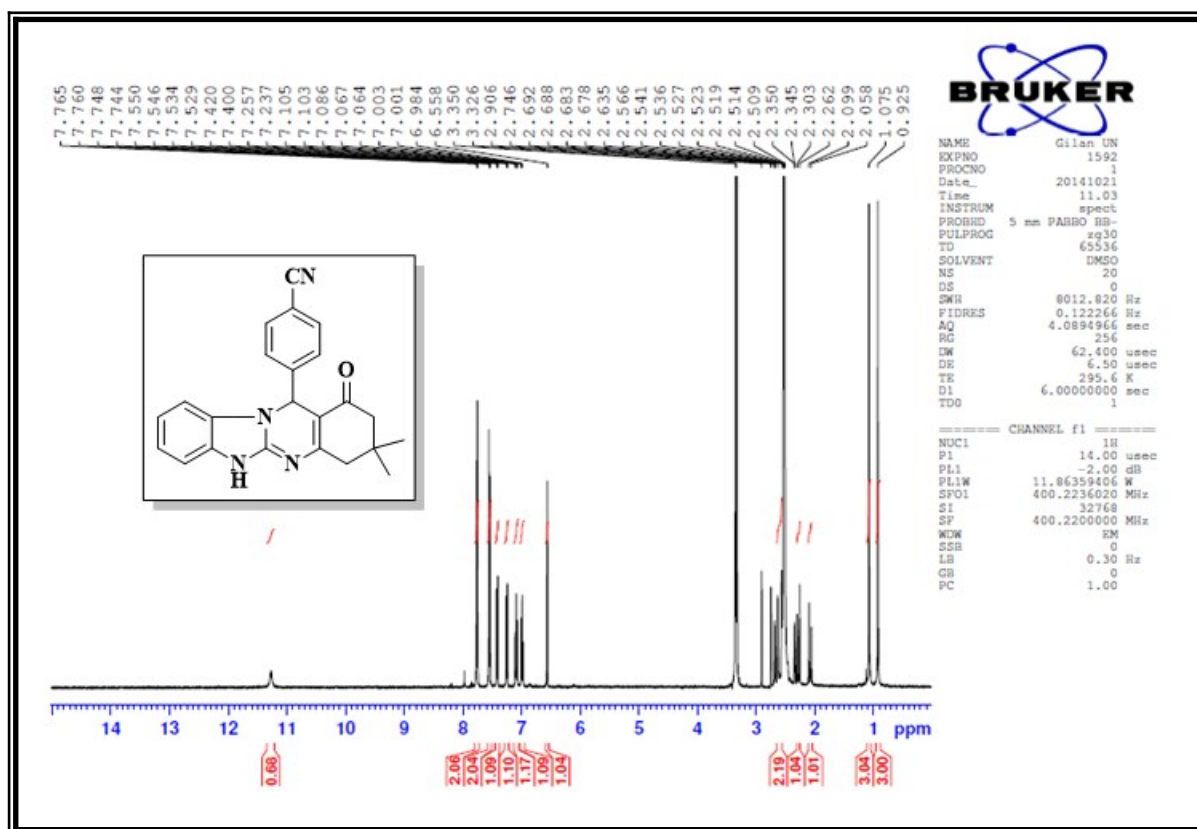

**Fig. 12.**  $^1\text{H}$  NMR of 3,3-Dimethyl-12-(4-cyano-phenyl)-3,4,5,12-tetrahydrobenzimidazo[2,1-*b*]quinazolin-1(2*H*)-one.

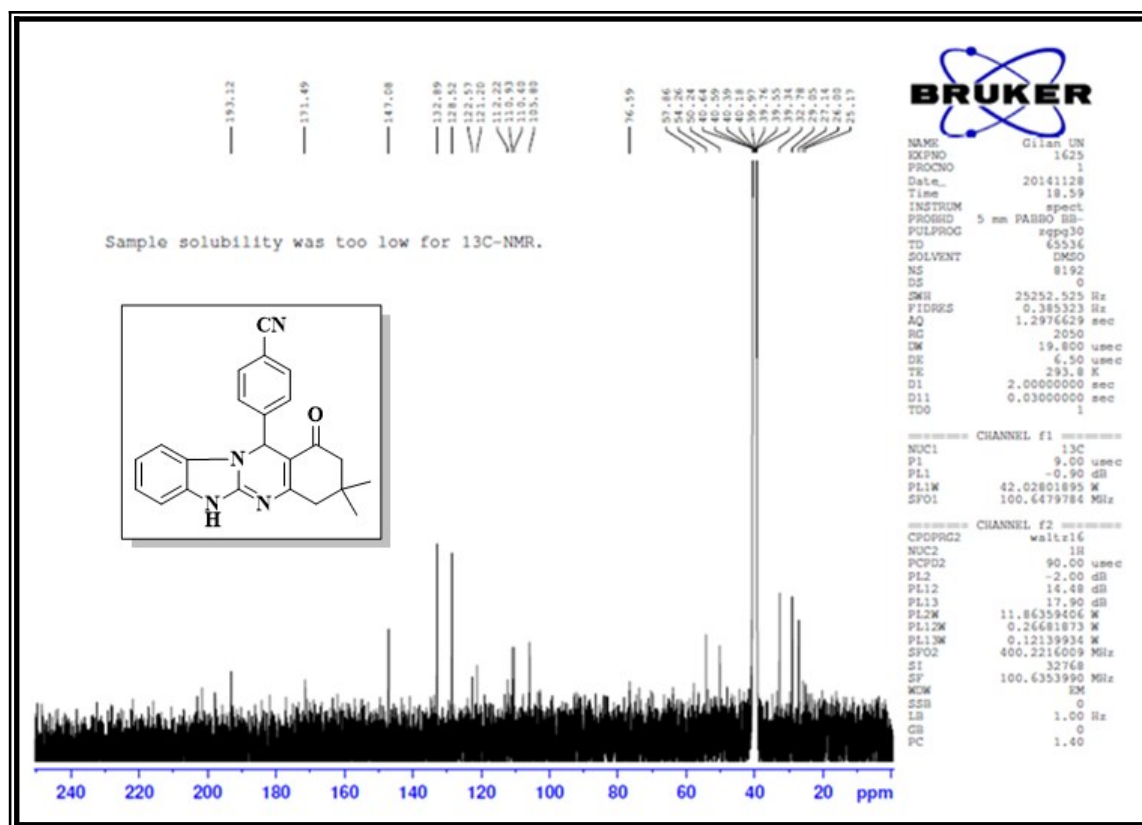

**Fig. 13.**  $^{13}\text{C}$  NMR of 3,3-Dimethyl-12-(4-cyano-phenyl)-3,4,5,12-tetrahydrobenzimidazo[2,1-*b*]quinazolin-1(2*H*)-one.

**3,3-Dimethyl-12-(2-naphthyl)-3,4,5,12-tetrahydrobenzo[4,5]imidazo[2,1-*b*]quinazolin-**

**1(2*H*)-one (1P):** White solid, Yield: 89%, M.p. 344-346 °C; FT-IR (KBr)  $\nu_{\max}$  = 3443, 3050, 2964, 1575, 1370, 1261, 746  $\text{cm}^{-1}$ ;  $^1\text{H}$  NMR (DMSO- $d_6$ , 400 MHz):  $\delta$  0.94 (3H, s,  $\text{CH}_3$ ), 1.08 (3H, s,  $\text{CH}_3$ ), 2.04 (1H, d,  $J = 16.0$  Hz), 2.29 (1H, d,  $J = 16.0$  Hz), 2.67- 2.74 (2H, m), 6.60 (1H, s), 6.93 (1H, t,  $J = 7.6$  Hz), 7.03 (1H, t,  $J = 7.6$  Hz), 7.31 (2H, m), 7.38 (1H, d,  $J = 8.0$  Hz), 7.49 (2H, m), 7.80 (2H, t,  $J = 7.6$  Hz), 7.92 (1H, d,  $J = 7.6$ ), 8.04 (1H, s), 11.19 (1H, s, NH) ppm.;  $^{13}\text{C}$  NMR (DMSO- $d_6$ , 100 Mz): Sample solubility was too low for  $^{13}\text{C}$  NMR.

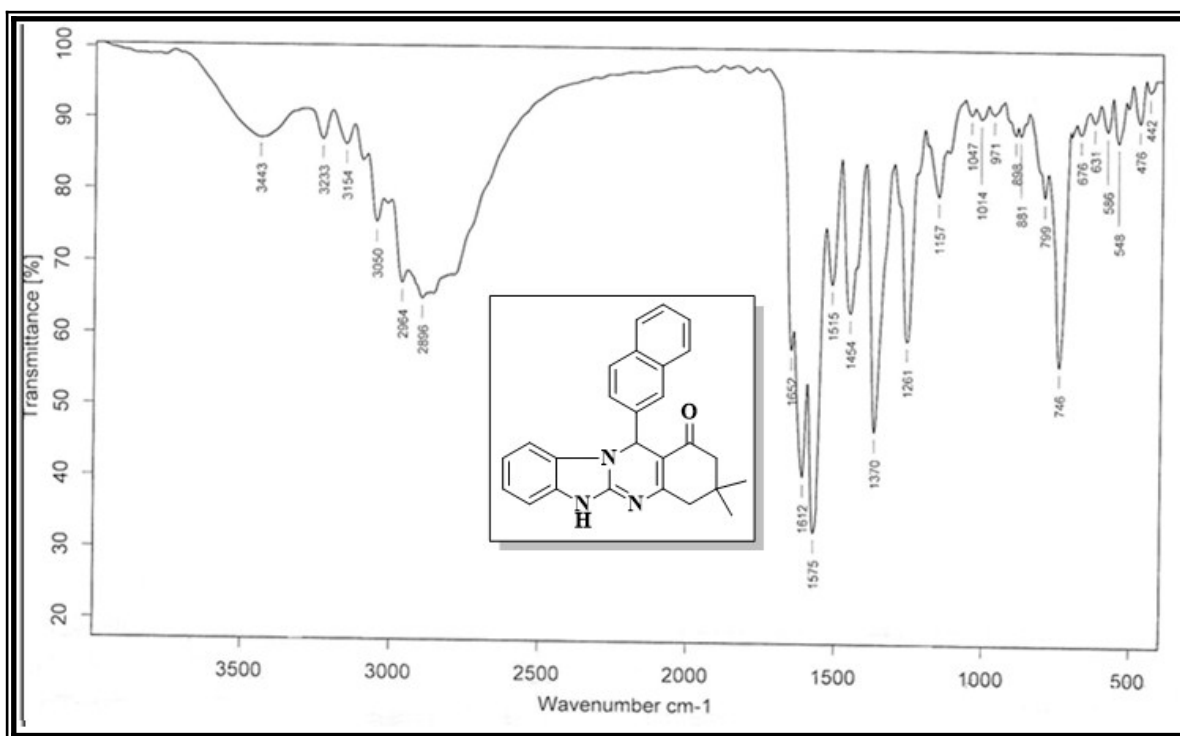

**Fig. 14.** FT-IR of 3,3-Dimethyl-12-(2-naphthyl)-3,4,5,12-tetrahydrobenzo[4,5]imidazo[2,1-*b*]quinazolin-1(2*H*)-one.

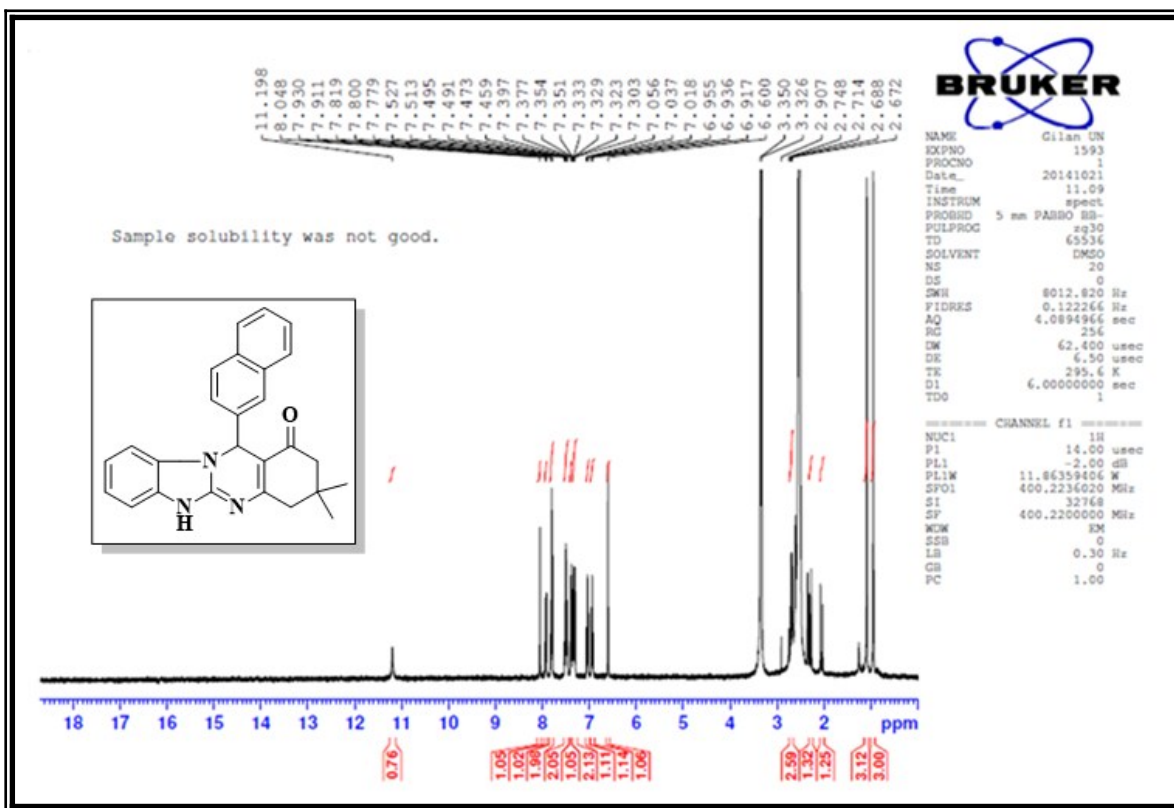

Fig. 15. <sup>1</sup>H NMR of 3,3-Dimethyl-12-(2-naphthyl)-3,4,5,12-tetrahydrobenzo[4,5]imidazo[2,1-*b*]quinazolin-1(2*H*)-one.

**12-(2-Fluorenyl)-3,3-dimethyl-3,4,5,12-tetrahydrobenzo[4,5]imidazo[2,1-*b*]quinazolin-**

**1(2*H*)-one (1Q):** White solid, Yield: 89%, M.p. 347-349 °C; FT-IR (KBr)  $\nu_{\max}$  = 3431, 3047, 3229, 2908, 1575, 1372, 1264, 741  $\text{cm}^{-1}$ ;  $^1\text{H}$  NMR (DMSO- $d_6$ , 400 MHz):  $\delta$  0.96 (3H, s,  $\text{CH}_3$ ), 1.08 (3H, s,  $\text{CH}_3$ ), 2.07 (1H, d,  $J = 16.0$  Hz), 2.28 (1H, d,  $J = 16.0$  Hz), 2.65-2.69 (2H, m), 3.85 (2H, s,  $\text{CH}_2$ ), 6.50 (1H, s), 6.96 (1H, td,  $J_1 = 7.2$  Hz,  $J_2 = 1.2$  Hz), 7.05 (1H, td,  $J_1 = 7.2$  Hz,  $J_2 = 1.2$  Hz), 7.28 (1H, td,  $J_1 = 7.2$  Hz,  $J_2 = 1.2$  Hz), 7.31 (2H, d,  $J = 7.6$  Hz), 7.38 (2H, d,  $J = 7.6$  Hz), 7.54 (1H, d,  $J = 7.2$  Hz), 7.54 (1H, s), 7.78 (1H, d,  $J = 7.6$  Hz), 7.81 (1H, d,  $J = 7.2$  Hz), 11.1 (1H, s, NH) ppm.;  $^{13}\text{C}$  NMR (DMSO- $d_6$ , 100 Mz): Sample solubility was too low for  $^{13}\text{C}$  NMR.

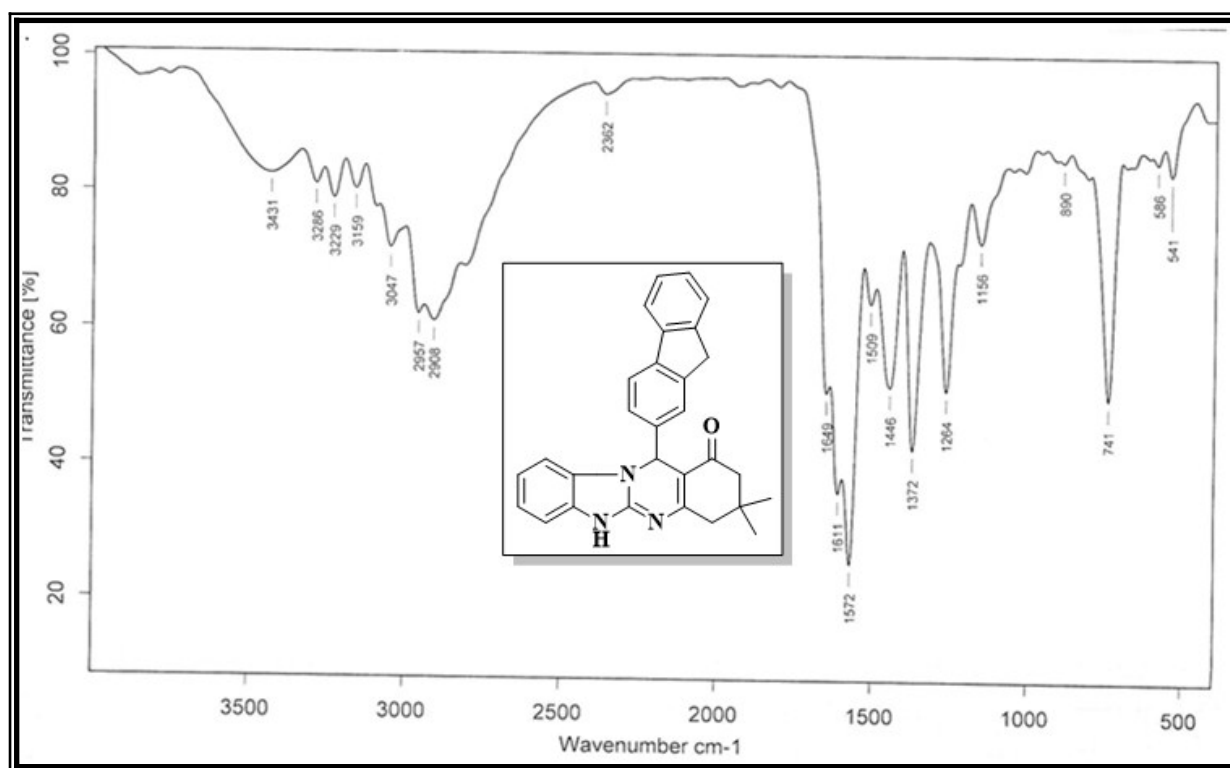

**Fig. 16.** FT-IR of 12-(2-Fluorenyl)-3,3-dimethyl-3,4,5,12-tetrahydrobenzo[4,5]imidazo[2,1-*b*]quinazolin-1(2*H*)-one.

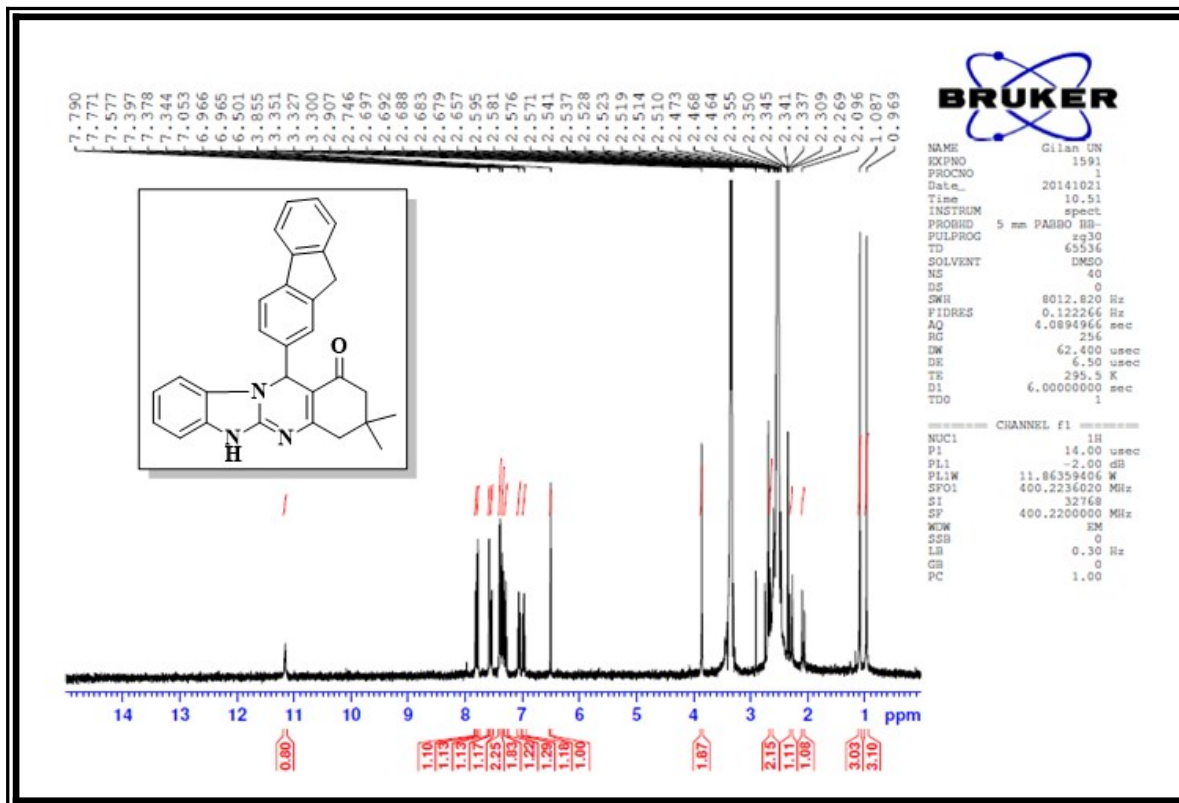

**Fig. 17.**  $^1\text{H}$  NMR of 12-(2-Fluorenyl)-3,3-dimethyl-3,4,5,12-tetrahydrobenzo[4,5]imidazo[2,1-*b*]quinazolin-1(2*H*)-one.

### General procedure for the preparation of 1-(benzothiazolylamino)phenylmethyl-2-naphthols

A mixture of the aldehyde (1 mmol), 2-aminobenzothiazole (1 mmol), 2-naphthol (1 mmol) and [PVP-SO<sub>3</sub>H]HSO<sub>4</sub> (50 mg, 17.3 mol %) was heated in an oil bath (100 °C) under solvent-free conditions for the appropriate time (Table 1). After completion of the reaction that monitored by TLC [*n*-hexane : ethylacetate (8:2)], ethyl acetate (10 mL) was added and the catalyst was separated by filtration. In continue the solvent was evaporated, and the requested product was purified by recrystallization from aqueous ethanol.

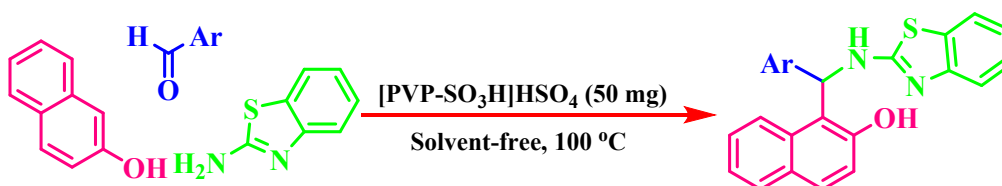

**Scheme 3.** [PVP-SO<sub>3</sub>H]HSO<sub>4</sub> catalyzed the synthesis of 1-(benzothiazolylamino)-phenylmethyl-2-naphthols derivatives.

**Table 4.** Preparation of 1-(benzothiazolylamino)phenylmethyl-2-naphthol derivatives catalyzed by [PVP-SO<sub>3</sub>H]HSO<sub>4</sub> under solvent-free conditions.

| Entry     | Aldehyde                                                                            | Time (min) | Yield (%) <sup>a</sup> | Melting point (°C) |                          |
|-----------|-------------------------------------------------------------------------------------|------------|------------------------|--------------------|--------------------------|
|           |                                                                                     |            |                        | Found              | Reported <sup>Ref.</sup> |
| <b>2A</b> | C <sub>6</sub> H <sub>5</sub> -                                                     | 6          | 94                     | 201-203            | 202-204 <sup>37</sup>    |
| <b>2B</b> | 2-Cl-C <sub>6</sub> H <sub>4</sub> -                                                | 6          | 90                     | 188-190            | 187-189 <sup>37</sup>    |
| <b>2C</b> | 2-CH <sub>3</sub> O-C <sub>6</sub> H <sub>5</sub> -                                 | 4          | 92                     | 170-172            | 168-170 <sup>37</sup>    |
| <b>2D</b> | 2-NO <sub>2</sub> -C <sub>6</sub> H <sub>4</sub> -                                  | 6          | 93                     | 218-220            | 215-216 <sup>37</sup>    |
| <b>2E</b> | 3-Br-C <sub>6</sub> H <sub>5</sub> -                                                | 4          | 92                     | 203-205            | 203-205 <sup>37</sup>    |
| <b>2F</b> | 3-CH <sub>3</sub> O-C <sub>6</sub> H <sub>5</sub> -                                 | 6          | 91                     | 184-186            | 184-186 <sup>37</sup>    |
| <b>2G</b> | 3-NO <sub>2</sub> -C <sub>6</sub> H <sub>5</sub> -                                  | 6          | 93                     | 190-192            | 191-194 <sup>33</sup>    |
| <b>2H</b> | 3-CH <sub>3</sub> -C <sub>6</sub> H <sub>5</sub> -                                  | 6          | 95                     | 187-188            | 189-191 <sup>55</sup>    |
| <b>2I</b> | 4-Cl-C <sub>6</sub> H <sub>4</sub> -                                                | 4          | 94                     | 208-210            | 209-210 <sup>32</sup>    |
| <b>2J</b> | 4-Br-C <sub>6</sub> H <sub>4</sub> -                                                | 4          | 93                     | 211-213            | 200-202 <sup>37</sup>    |
| <b>2K</b> | 4-CH <sub>3</sub> O-C <sub>6</sub> H <sub>5</sub> -                                 | 5          | 95                     | 172-174            | 172-173 <sup>36</sup>    |
| <b>2L</b> | 4-NO <sub>2</sub> -C <sub>6</sub> H <sub>5</sub> -                                  | 5          | 92                     | 186-188            | 187-189 <sup>37</sup>    |
| <b>2M</b> | 2-naphthyl-                                                                         | 5          | 95                     | 197-199            | 197-199 <sup>60</sup>    |
| <b>2N</b> |  | 5          | 92                     | 194-196            | 195-197 <sup>60</sup>    |
| <b>2O</b> | 2-pyridyl-                                                                          | 10         | 92                     | 191-193            | -                        |
| <b>2P</b> | 3-pyridyl-                                                                          | 6          | 93                     | 187-188            | 189-190 <sup>37</sup>    |
| <b>2Q</b> | 4-pyridyl-                                                                          | 5          | 89                     | 209-211            | 210-212 <sup>37</sup>    |



|           |                                                                                   |   |    |         |                       |
|-----------|-----------------------------------------------------------------------------------|---|----|---------|-----------------------|
| <b>2R</b> |  | 6 | 88 | 214-216 | 215-217 <sup>60</sup> |
|-----------|-----------------------------------------------------------------------------------|---|----|---------|-----------------------|

<sup>a</sup> Isolated yields.

**1-((Benzo[d]thiazol-2-ylamino)(pyridin-2-yl)methyl)naphthalen-2-ol (2O)** : White solid, Yield: 91%, M.p. 191-193 °C; FT-IR (KBr)  $\nu_{\max}$  = 3381, 1526, 1444, 1332, 1267, 1201, 1046, 745  $\text{cm}^{-1}$ ; <sup>1</sup>H NMR (DMSO-*d*<sub>6</sub>, 400 MHz):  $\delta$  7.00 (s, 1H), 7.02-7.80 (m, 15H), 8.80 (s, 1H), 10.28 (br, 1H) ppm; <sup>13</sup>C NMR (DMSO-*d*<sub>6</sub>, 100 MHz):  $\delta$  21.7, 119.3, 121.4, 121.4, 122.9, 123.7, 123.7, 125.9, 126.0, 126.8, 126.9, 127.1, 127.4, 127.5, 128.4, 128.5, 129.1, 130.0, 131.2, 132.6, 137.5, 143.0, 152.6, 153.6, 166.8 ppm.

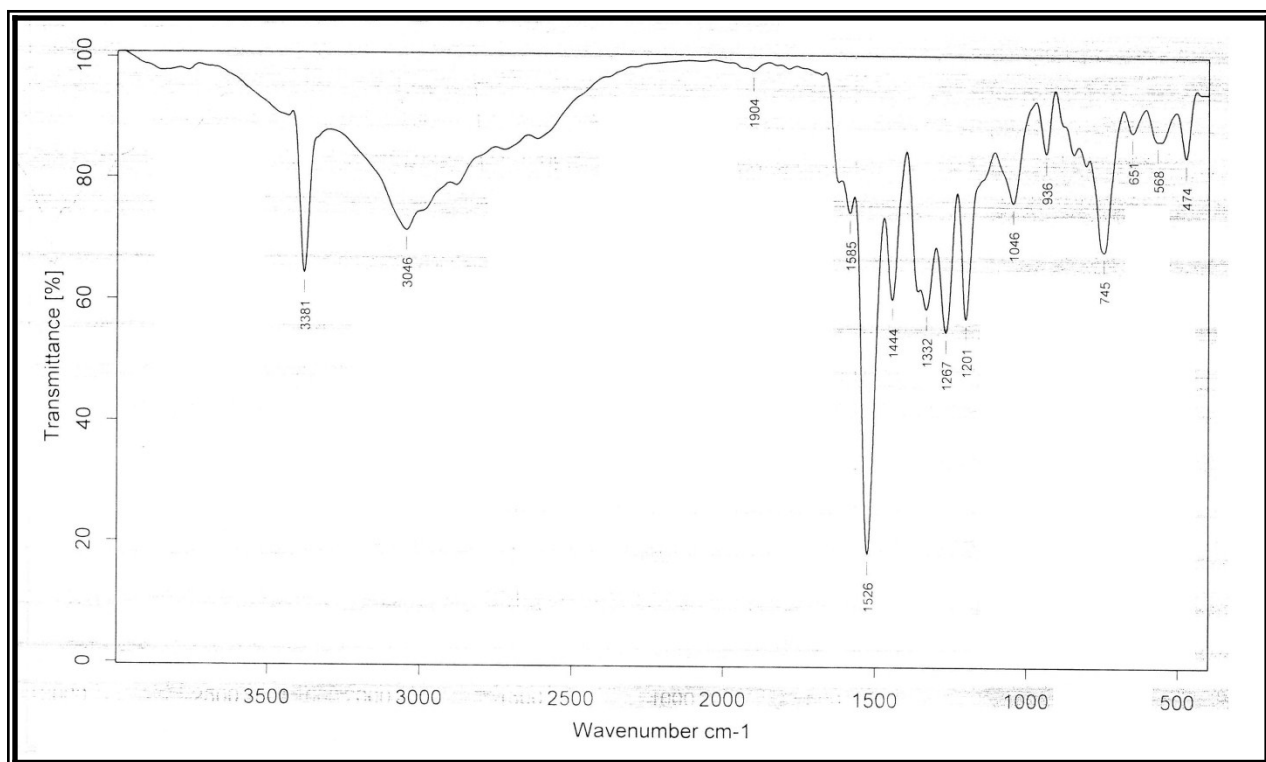

**Fig. 18.** FT-IR of 1-((Benzo[d]thiazol-2-ylamino)(pyridin-2-yl)methyl)naphthalen-2-ol.

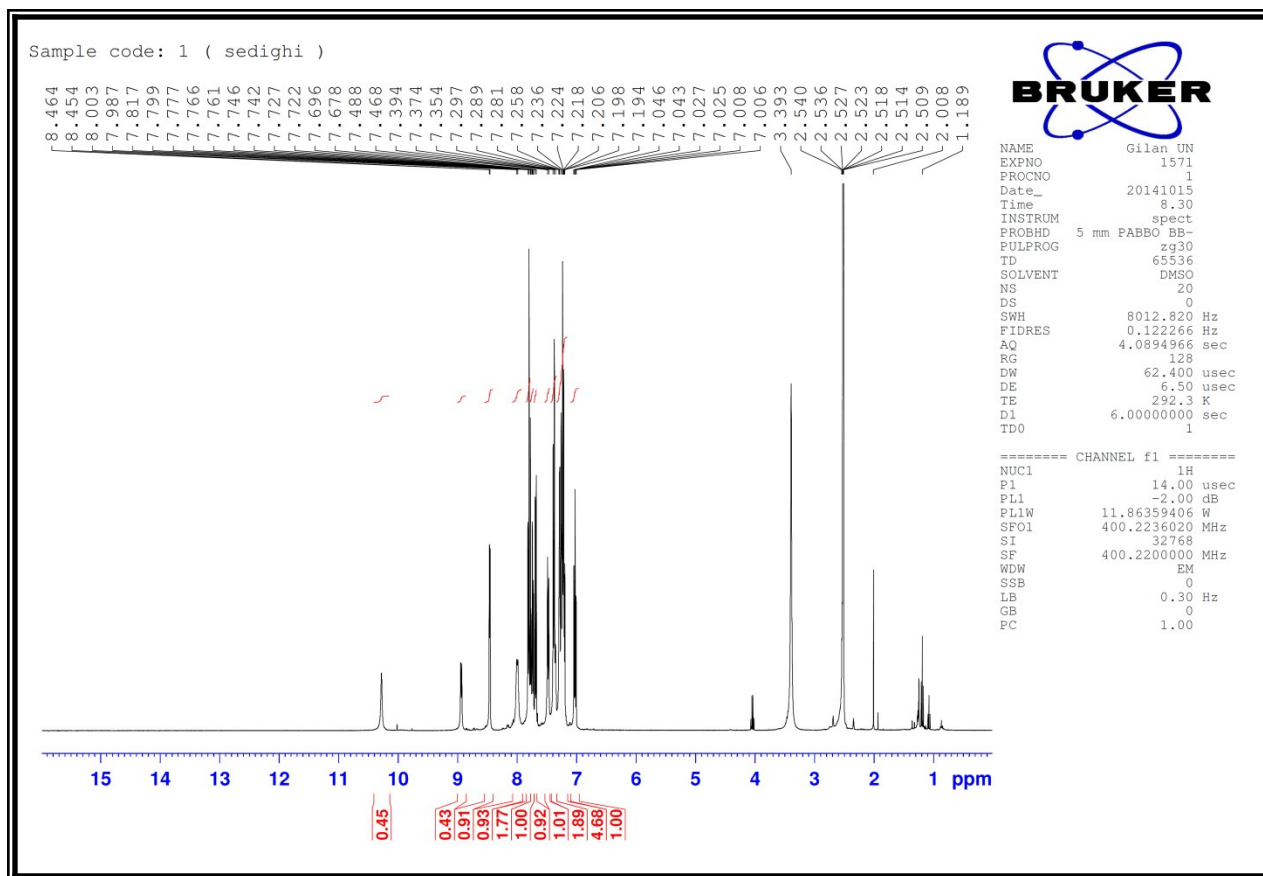

Fig. 19. <sup>1</sup>H NMR of 1-((Benzo[d]thiazol-2-ylamino)(pyridin-2-yl)methyl)naphthalen-2-ol.

**General procedure for the preparation of 2*H*-indazolo[2,1-*b*]phthalazine-1,6,11(13*H*)-triones**

A mixture of the requested aldehyde (1 mmol), dimedone and/ or 1,3-cyclohexadione (1 mmol), phthalhydrazide (1 mmol) and [PVP-SO<sub>3</sub>H]HSO<sub>4</sub> (10 mg, 3.46 mol%) was heated in an oil bath (80 °C) under solvent-free conditions for the appropriate time. After completion of the reaction that monitored by TLC [*n*-hexane : ethylacetate(8:2)], EtOH was added and the catalyst was separated by filtration. Then water was added and the precipitated product was separated by filtration in high purity.

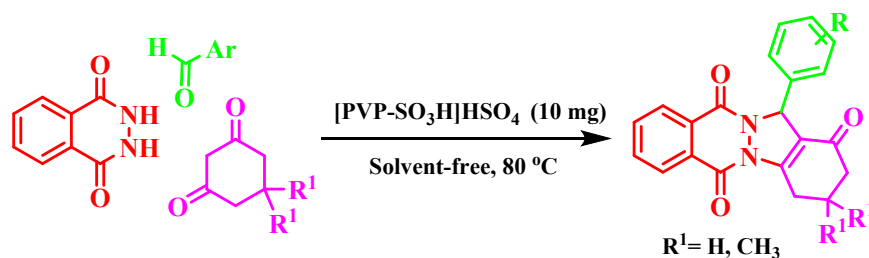

**Scheme 4.** [PVP-SO<sub>3</sub>H]HSO<sub>4</sub> catalyzed the synthesis of 2*H*-indazolo[2,1-*b*]phthalazine-1,6,11(13*H*)-triones derivatives.

**Table 5.** Preparation of 2*H*-indazolo[2,1-*b*]phthalazine-1,6,11(13*H*)-triones derivatives using [PVP-SO<sub>3</sub>H]HSO<sub>4</sub> as the catalyst.

| Entry     | Aldehyde                                            | R               | Time (min) | Yield (%) <sup>a</sup> | Melting point (°C) |                          |
|-----------|-----------------------------------------------------|-----------------|------------|------------------------|--------------------|--------------------------|
|           |                                                     |                 |            |                        | Found              | Reported <sup>ref.</sup> |
| <b>3A</b> | C <sub>6</sub> H <sub>5</sub> -                     | CH <sub>3</sub> | 10         | 90                     | 202-203            | 205-207 <sup>61</sup>    |
| <b>3B</b> | 2-Cl-C <sub>6</sub> H <sub>4</sub> -                | CH <sub>3</sub> | 18         | 89                     | 254-257            | 262-264 <sup>61</sup>    |
| <b>3C</b> | 2-CH <sub>3</sub> O-C <sub>6</sub> H <sub>5</sub> - | CH <sub>3</sub> | 17         | 88                     | 245-247            | 242-243 <sup>44</sup>    |
| <b>3D</b> | 2-NO <sub>2</sub> -C <sub>6</sub> H <sub>4</sub> -  | CH <sub>3</sub> | 20         | 91                     | 235-238            | 236-238 <sup>43</sup>    |
| <b>3E</b> | 2-OH-C <sub>6</sub> H <sub>4</sub> -                | CH <sub>3</sub> | 20         | 90                     | 180-182            | 184-188 <sup>39d</sup>   |
| <b>3F</b> | 3-CH <sub>3</sub> O-C <sub>6</sub> H <sub>5</sub> - | CH <sub>3</sub> | 12         | 93                     | 198-200            | 206-208 <sup>43</sup>    |
| <b>3G</b> | 3-NO <sub>2</sub> -C <sub>6</sub> H <sub>5</sub> -  | CH <sub>3</sub> | 13         | 94                     | 268-270            | 270-271 <sup>61</sup>    |
| <b>3H</b> | 4-Cl-C <sub>6</sub> H <sub>4</sub> -                | CH <sub>3</sub> | 8          | 96                     | 257-259            | 262-264 <sup>61</sup>    |
| <b>3I</b> | 4-Br-C <sub>6</sub> H <sub>4</sub> -                | CH <sub>3</sub> | 8          | 95                     | 252-256            | 258-260 <sup>61</sup>    |
| <b>3J</b> | 4-CH <sub>3</sub> O-C <sub>6</sub> H <sub>5</sub> - | CH <sub>3</sub> | 12         | 94                     | 215-217            | 220-221 <sup>61</sup>    |
| <b>3K</b> | 4-NO <sub>2</sub> -C <sub>6</sub> H <sub>5</sub> -  | CH <sub>3</sub> | 15         | 93                     | 217-220            | 220-222 <sup>61</sup>    |
| <b>3L</b> | C <sub>6</sub> H <sub>5</sub> -                     | H               | 8          | 95                     | 220-222            | 222-224 <sup>39c</sup>   |
| <b>3M</b> | 2-Cl-C <sub>6</sub> H <sub>4</sub> -                | H               | 15         | 93                     | 232-234            | -                        |
| <b>3N</b> | 2-NO <sub>2</sub> -C <sub>6</sub> H <sub>4</sub> -  | H               | 18         | 92                     | 248-250            | -                        |
| <b>3O</b> | 3-NO <sub>2</sub> -C <sub>6</sub> H <sub>5</sub> -  | H               | 12         | 92                     | 222-224            | 228-230 <sup>39c</sup>   |
| <b>3P</b> | 4-Cl-C <sub>6</sub> H <sub>4</sub> -                | H               | 6          | 93                     | 250-255            | ----- <sup>39c</sup>     |
| <b>3Q</b> | 4-Br-C <sub>6</sub> H <sub>4</sub> -                | H               | 6          | 94                     | 270-274            | 279-282 <sup>39d</sup>   |

|           |                                                                     |   |    |    |         |                        |
|-----------|---------------------------------------------------------------------|---|----|----|---------|------------------------|
| <b>3R</b> | 4-CH <sub>3</sub> O-C <sub>6</sub> H <sub>5</sub> -                 | H | 8  | 94 | 250-254 | 254-255 <sup>39c</sup> |
| <b>3S</b> | 4-NO <sub>2</sub> -C <sub>6</sub> H <sub>5</sub> -                  | H | 25 | 87 | 240-245 | 252-254 <sup>43</sup>  |
| <b>3T</b> | 4-CN-C <sub>6</sub> H <sub>5</sub> -                                | H | 30 | 93 | 284-285 | >280 <sup>45</sup>     |
| <b>3U</b> | 4-CH <sub>3</sub> -C <sub>6</sub> H <sub>5</sub> -                  | H | 5  | 90 | 237-240 | 244-246 <sup>39c</sup> |
| <b>3V</b> | 4-OH-C <sub>6</sub> H <sub>4</sub> -                                | H | 15 | 93 | 259-261 | 265-266 <sup>39c</sup> |
| <b>3W</b> | 4-(CH <sub>3</sub> ) <sub>2</sub> N-C <sub>6</sub> H <sub>4</sub> - | H | 17 | 85 | 248-251 | 256-258 <sup>39c</sup> |

---

<sup>a</sup>Isolated yield.

### 13-(2-Chlorophenyl)-2,3,4,13-tetrahydro-1*H*-indazolo[1,2-*b*]phthalazine-1,6,11-trione

**(3M):** White solid, Yield: 93%, M.p. 232-234 °C; FT-IR (KBr):  $\nu_{\max}$  = 3075, 2959, 1658, 1526, 1357, 1311, 1267, 1139, 1017, 701  $\text{cm}^{-1}$ .  $^1\text{H}$  NMR (DMSO- $d_6$ , 400 MHz):  $\delta$  2.13-2.14 (m, 2H,  $\text{CH}_2$ ), 2.32-2.36 (m, 2H,  $\text{CH}_2$ ), 3.29-3.45 (m, 2H,  $\text{CH}_2$ ), 6.61 (s, 1H, CH), 7.27-7.31 (m, 2H, Ar-H), 7.39-7.41 (m, 2H, Ar-H), 7.52-7.54 (m, 1H, Ar-H), 7.09-8.00 (m, 2H, Ar-H), 8.08-8.10 (m, 1H, Ar-H), 8.28-8.30 (m, 1H, Ar-H) ppm.

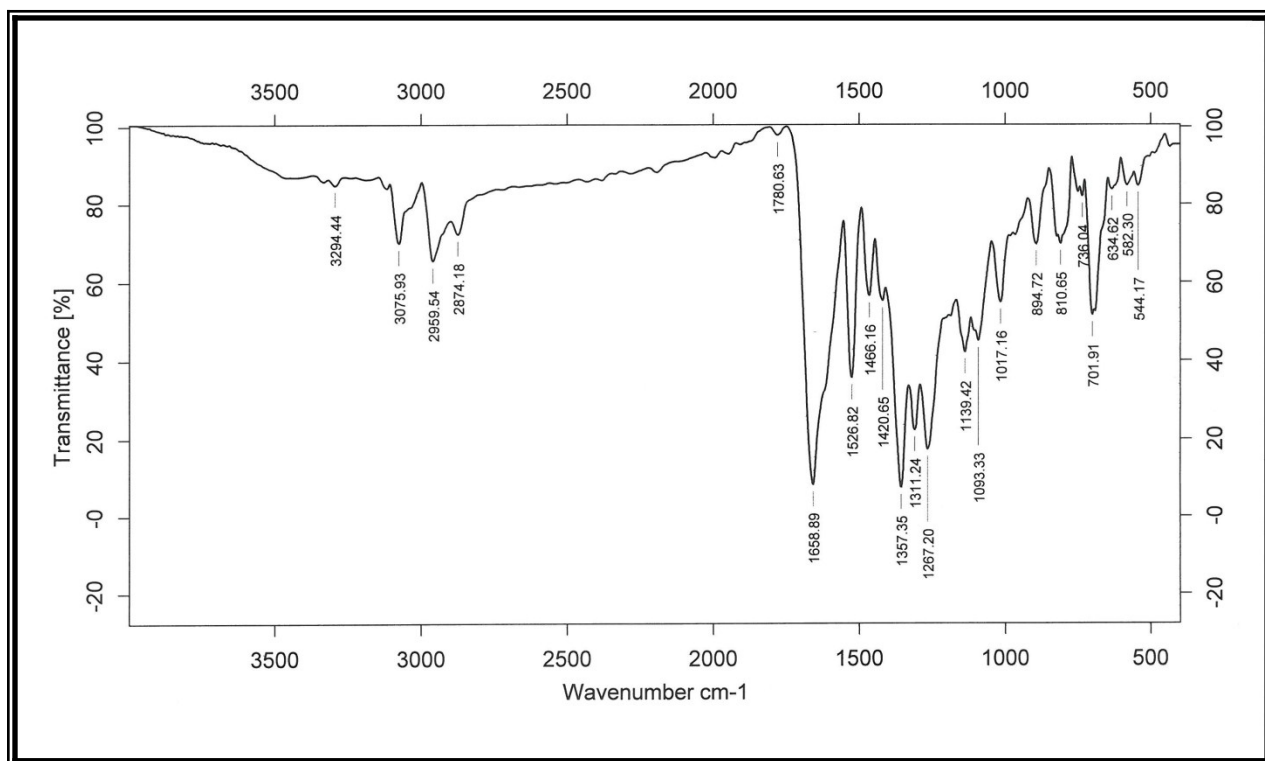

**Fig. 20.** FT-IR of 13-(2-Chlorophenyl)-2,3,4,13-tetrahydro-1*H*-indazolo[1,2-*b*]phthalazine-1,6,11-trione.

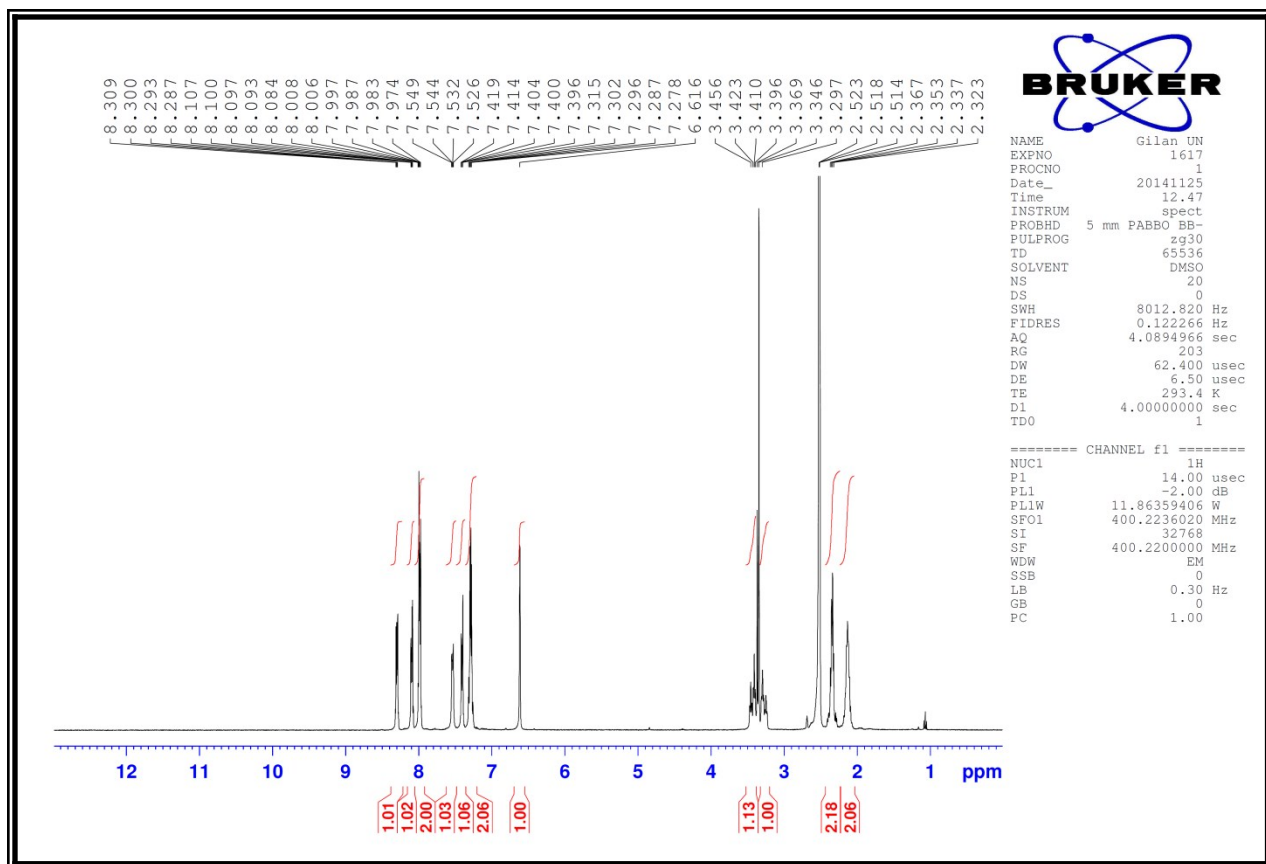

**Fig. 21.**  $^1\text{H}$  NMR of 13-(2-Chlorophenyl)-2,3,4,13-tetrahydro-1*H*-indazolo[1,2-*b*]phthalazine-1,6,11-trione.

**13-(2-Nitrophenyl)-2,3,4,13-tetrahydro-1H-indazolo[1,2-b]phthalazine-1,6,11-trione (3N):**

White solid, Yield: 92%, M.p. 248-250 °C; FT-IR (KBr):  $\nu_{\max}$  = 2954, 1660, 1524, 1364, 1271, 698  $\text{cm}^{-1}$ ;  $^1\text{H}$  NMR (DMSO- $d_6$ , 400 MHz):  $\delta$  2.10-2.17 (m, 2H,  $\text{CH}_2$ ), 2.33-2.36 (m, 2H,  $\text{CH}_2$ ), 3.24-3.45 (m, 2H,  $\text{CH}_2$ ), 7.18 (s, 1H, CH), 7.52-7.56 (1H, td,  $J_1 = 7.2$  Hz,  $J_2 = 1.2$  Hz), 7.61-7.65 (1H, td,  $J_1 = 7.2$  Hz,  $J_2 = 1.2$  Hz), 7.70-7.72 (2H, dd,  $J_1 = 8.0$  Hz,  $J_2 = 1.2$  Hz), 7.97-8.01 (m, 3H, Ar-H), 8.07-8.11 (m, 1H, Ar-H), 8.27-8.29 (m, 1H, Ar-H) ppm.;  $^{13}\text{C}$  NMR (DMSO- $d_6$ , 100 MHz) :  $\delta$  192.75, 155.87, 154.40, 154.21, 149.28, 135.07, 134.37, 134.13, 131.80, 131.25, 129.78, 129.61, 133.538, 132.547, 132.393, 132.108, 125.427, 63.976, 39.559, 27.569, 25.566 ppm.

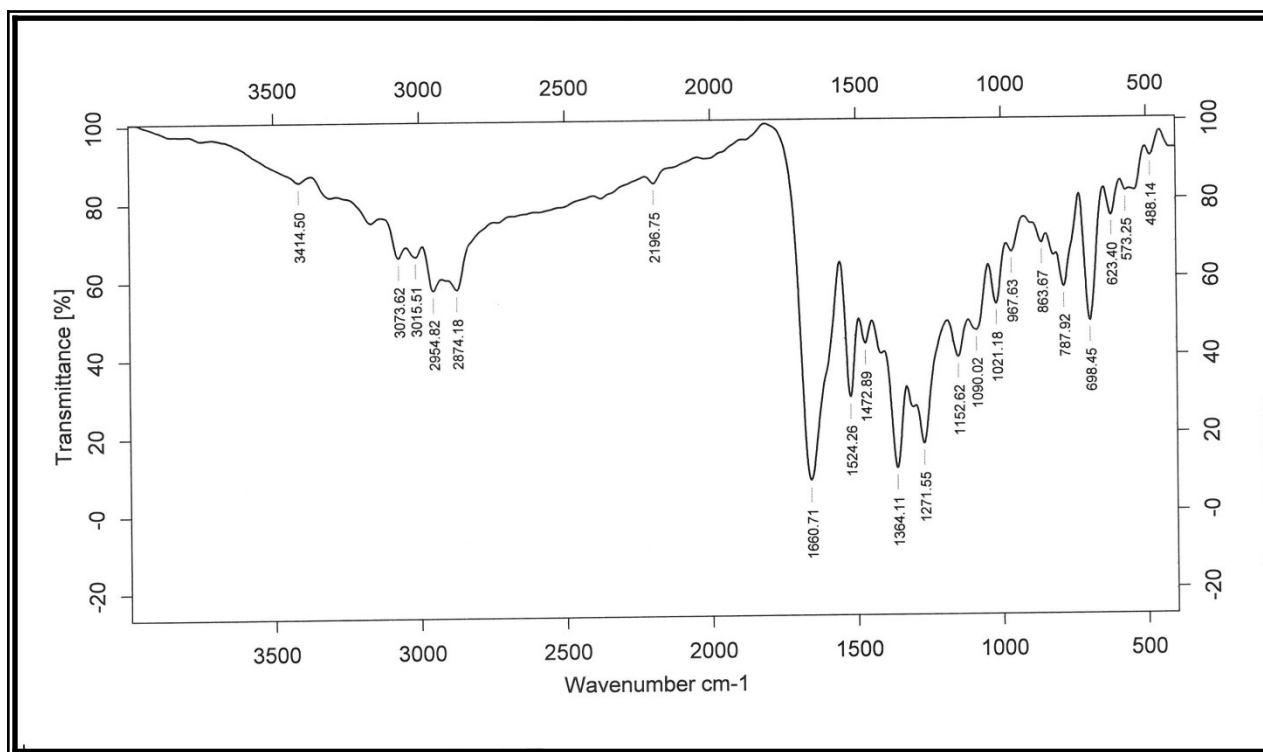

**Fig. 22.** FT-IR of 13-(2-Nitrophenyl)-2,3,4,13-tetrahydro-1H-indazolo[1,2-b]phthalazine-1,6,11-trione.



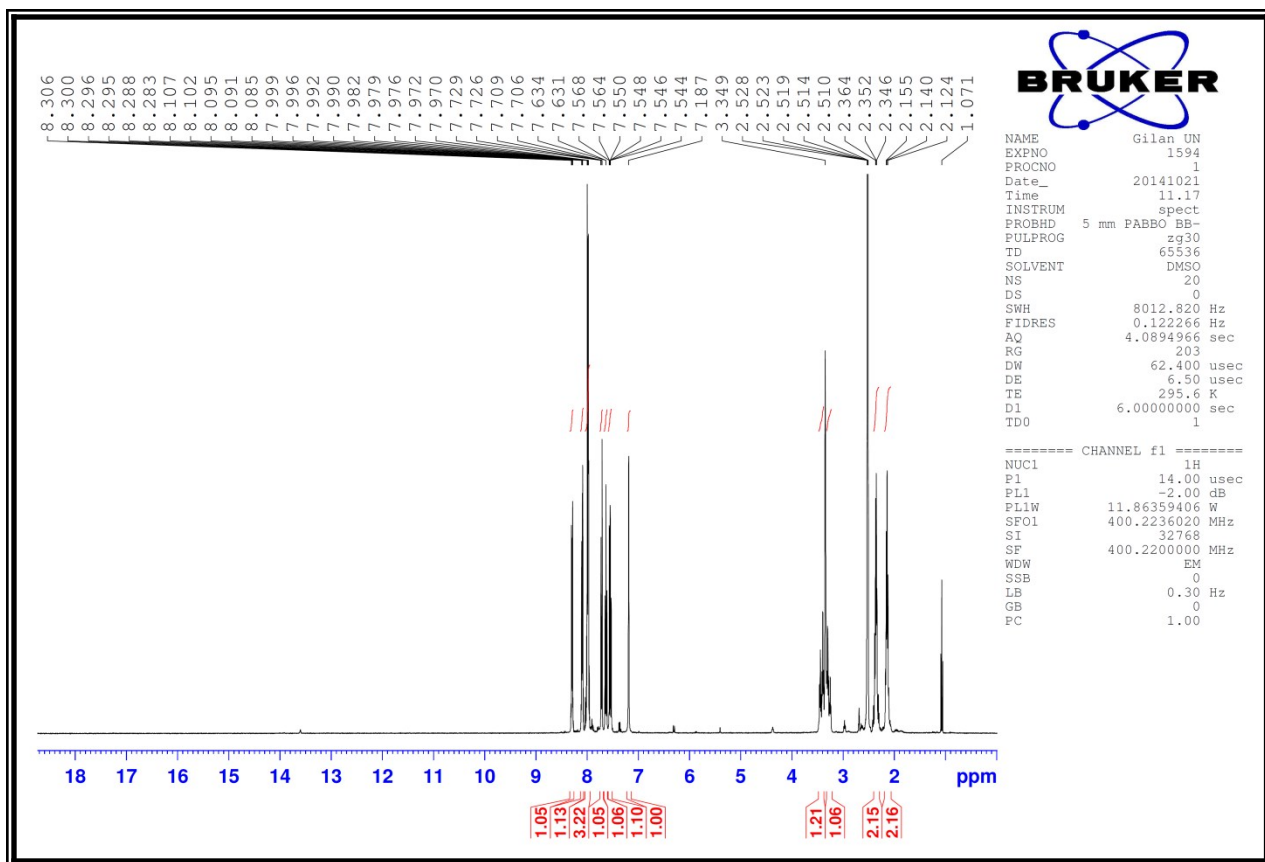

**Fig. 23.**  $^1\text{H}$  NMR of 13-(2-Nitrophenyl)-2,3,4,13-tetrahydro-1*H*-indazolo[1,2-*b*]phthalazine-1,6,11-trione.

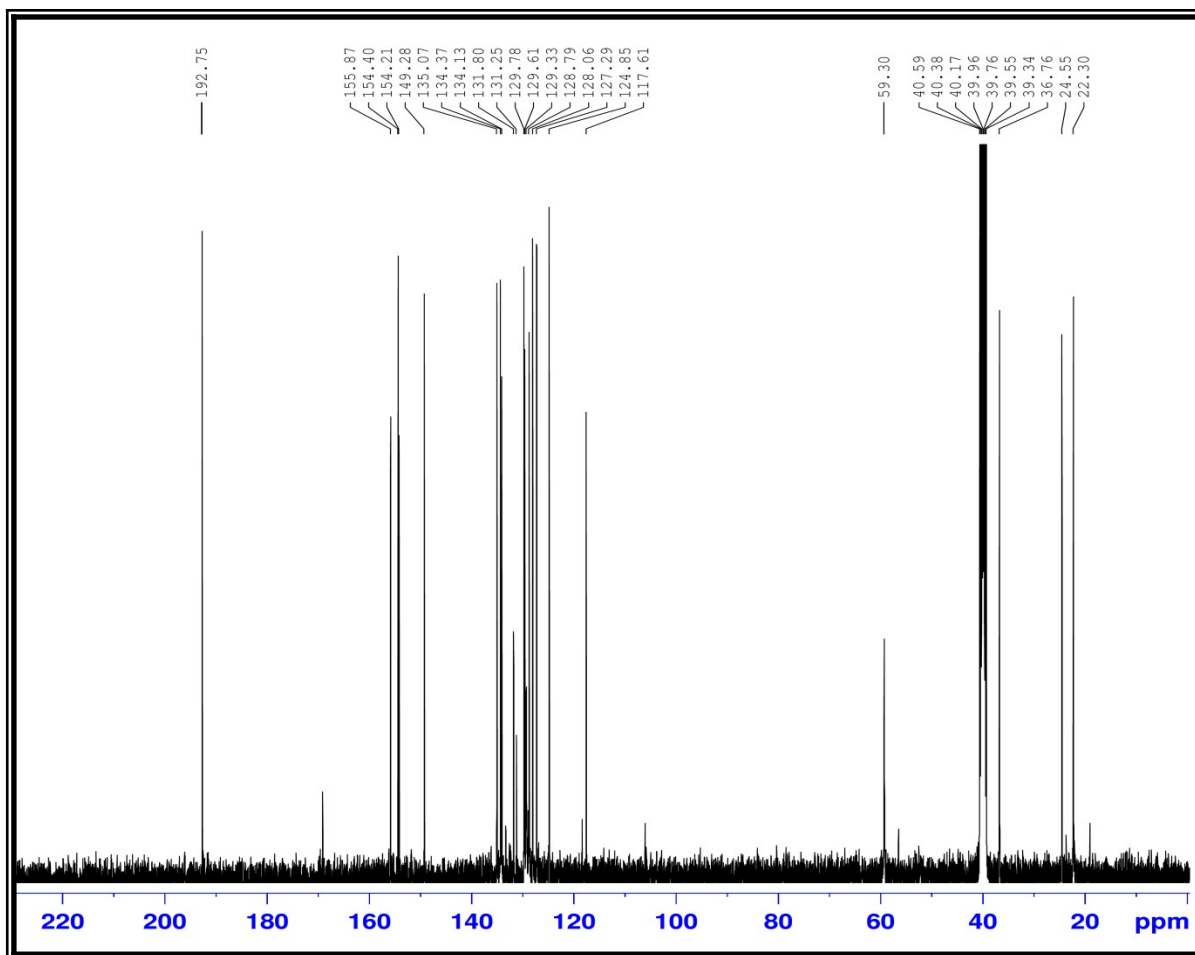

**Fig. 24.**  $^{13}\text{C}$  NMR of 13-(2-Nitrophenyl)-2,3,4,13-tetrahydro-1*H*-indazolo[1,2-*b*]phthalazine-1,6,11-trione.

**4-(1,6,11-Trioxo-2,3,4,6,11,13-hexahydro-1*H*-indazolo[1,2-*b*]phthalazin-13-yl)benzonitrile**

**(3T):** White solid, Yield: 93%, M.p. 284-285 °C; FT-IR (KBr):  $\nu_{\max}$  = 2953, 2658, 1472, 1361, 1306, 1262, 835, 698  $\text{cm}^{-1}$ .  $^1\text{H}$  NMR (DMSO- $d_6$ , 400 MHz):  $\delta$  2.11-2.13 (m, 2H,  $\text{CH}_2$ ), 2.33-2.36 (m, 2H,  $\text{CH}_2$ ), 3.21-3.26 (m, 2H,  $\text{CH}_2$ ), 6.35 (s, 1H, CH), 7.71-7.73 (d,  $J=8$  Hz, 2H, Ar-H), 7.79-7.81 (d,  $J=8$  Hz, 2H, Ar-H), 7.97-8.01 (m, 2H, Ar-H), 8.09-8.11 (m, 1H, Ar-H), 8.28-8.30 (m, 1H, Ar-H) ppm.

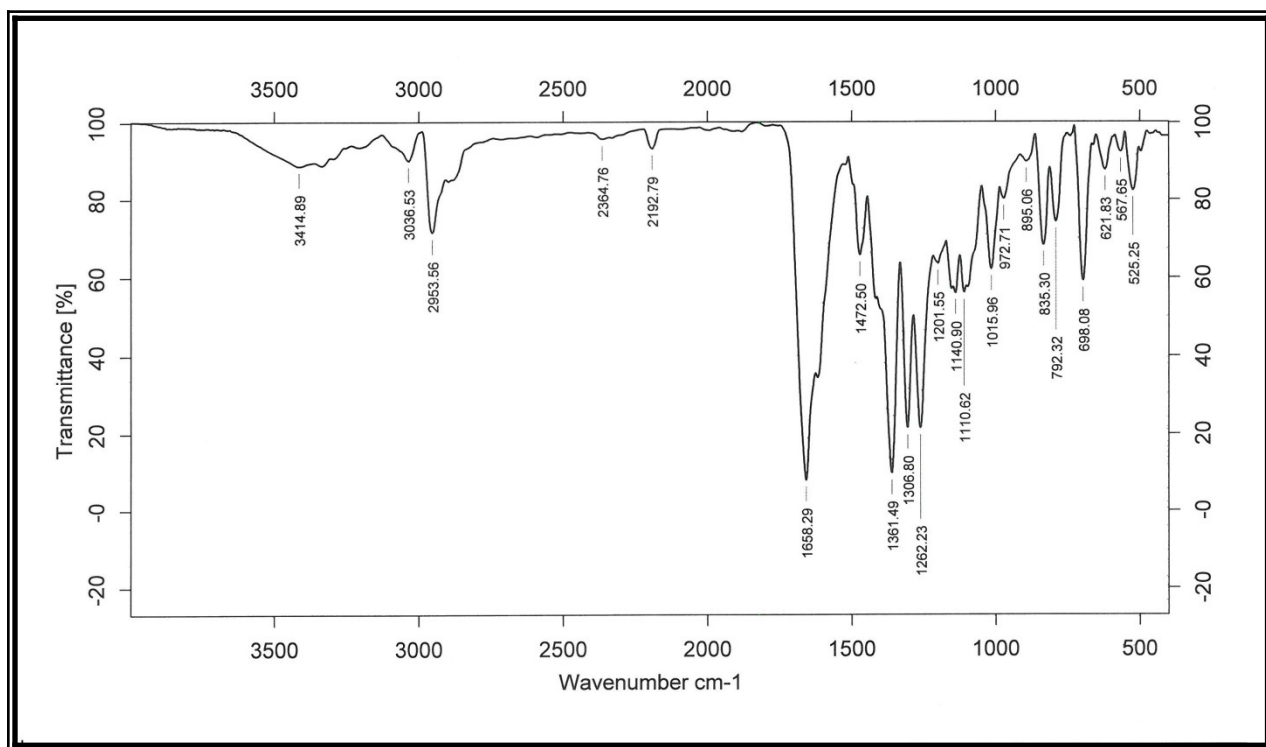

**Fig. 25.** FT-IR of 4-(1,6,11-Trioxo-2,3,4,6,11,13-hexahydro-1*H*-indazolo[1,2-*b*]phthalazin-13-yl)benzonitrile.

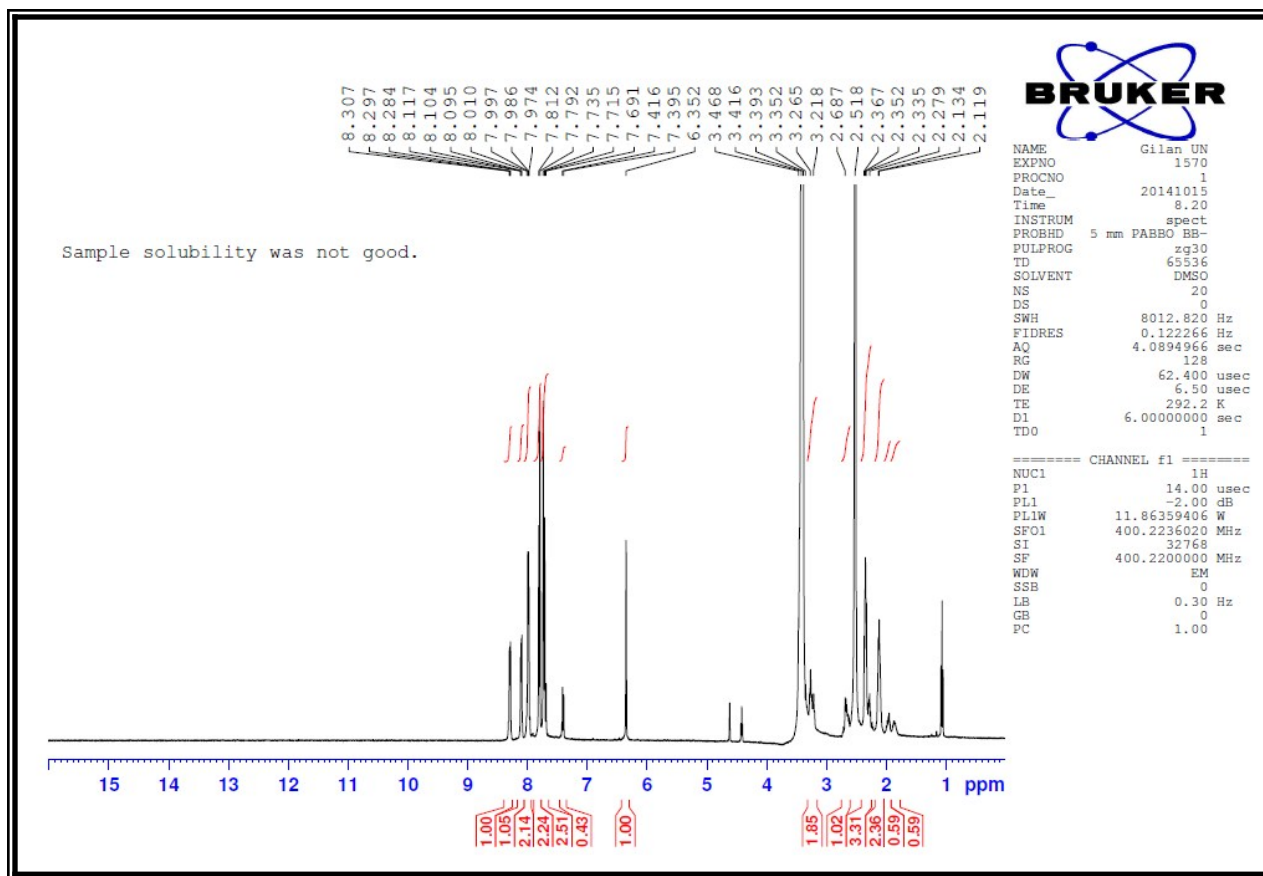

**Fig. 26.**  $^1\text{H}$  NMR of 4-(1,6,11-Trioxo-2,3,4,6,11,13-hexahydro-1*H*-indazolo[1,2-*b*]phthalazin-13-yl)benzotrile.
